# From spikes to intercellular waves: tuning the strength of calcium stimulation modulates organ size control

Ramezan Paravitorghabeh<sup>a,1</sup>, Dharsan Soundarrajan<sup>a,2</sup>, and Jeremiah J. Zartman<sup>a,3</sup>

<sup>a</sup>Department of Chemical and Biomolecular Engineering, University of Notre Dame, Notre Dame, IN, USA

1 **Calcium ( $\text{Ca}^{2+}$ ) signaling is a fundamental molecular communication**  
2 **mechanism for the propagation of information in eukaryotic cells. Cy-**  
3 **tosolic calcium ions integrate a broad range of hormonal, mechani-**  
4 **cal and electrical stimuli within cells to modulate downstream cel-**  
5 **lular processes involved in organ development. However, how the**  
6 **spatiotemporal dynamics of calcium signaling are controlled at the**  
7 **organ level remains poorly understood. Here, we show that the spa-**  
8 **tiotemporal extent of calcium signaling within an epithelial system**  
9 **is determined by the class and level of hormonal stimulation and by**  
10 **the subdivision of the cell population into a small fraction of initia-**  
11 **tor cells surrounded by a larger fraction of standby cells connected**  
12 **through gap junction communication. To do so, we built a geomet-**  
13 **rically accurate computational model of intercellular  $\text{Ca}^{2+}$  signaling**  
14 **that spontaneously occurs within developing *Drosophila* wing imag-**  
15 **inal discs. The multi-scale computational model predicts the regu-**  
16 **lation of the main classes of  $\text{Ca}^{2+}$  signaling dynamics observed in**  
17 **in vivo: single cell  $\text{Ca}^{2+}$  spikes, intercellular transient bursts, intercellu-**  
18 **lar waves and global fluttering. We show that the tuning of the spatial**  
19 **extent of  $\text{Ca}^{2+}$  dynamics from single cells to global waves emerges**  
20 **naturally as a function of global hormonal stimulation strength. Fur-**  
21 **ther, this model provides insight into how emergent properties of in-**  
22 **tercellular calcium signaling dynamics modulates cell growth within**  
23 **the tissue context. It provides a framework for analyzing second mes-**  
24 **senger dynamics in multicellular systems.**

$\text{Ca}^{2+}$  signaling | Second messengers | Gap junction communication |  
Spatiotemporal patterns | Information processing | Hopf bifurcation.

1 **C**alcium ions ( $\text{Ca}^{2+}$ ) mediate a large number of physi-  
2 **ological and regulatory processes such as proliferation,**  
3 **differentiation, transcription, metabolism, cellular motility, fer-**  
4 **tilization, neuronal communication, muscle contraction, wound**  
5 **healing, cellular senescence and apoptosis (1–10). Such a**  
6 **broad range of functionality is primarily induced through co-**  
7 **ordinated variations in cytosolic free  $\text{Ca}^{2+}$  concentration in**  
8 **space and time (11). In addition to modulating cellular pro-**  
9 **cesses,  $\text{Ca}^{2+}$  signaling also regulates developmental processes**  
10 **at the multicellular level. For instance,  $\text{Ca}^{2+}$  is shown to reg-**  
11 **ulate scale development in the butterfly (12) and mediates**  
12 **autophagic and apoptotic processes required for hearing acqui-**  
13 **sition in the developing cochlea (13, 14). A major challenge**  
14 **for understanding the emergent properties of  $\text{Ca}^{2+}$  signaling**  
15 **in multicellular systems is the lack of a suitable framework**  
16 **for analyzing, imaging and perturbing the stochastic signals**  
17 **systematically.**

18 In our recent study, we found that  $\text{Ca}^{2+}$  dynamics cor-  
19 **relates with final organ size during the development of the**  
20 ***Drosophila* larval wing disc, a genetic model for organogenesis**  
21 **(15). Specifically,  $\text{Ca}^{2+}$  dynamics in growing wing discs ex-**  
22 **hibit a progression from a global “fluttering” state in smaller,**

23 **younger discs to infrequent single cell spikes in large, older**  
24 **discs as development proceeds. This ordinal progression is**  
25 **recapitulated by culturing ex vivo cultured wing discs with**  
26 **increasing concentrations of fly extract (FEX) titration, a**  
27 **serum-based stimulus of calcium activity. However, it remains**  
28 **unclear what might govern this progression mechanistically.**  
29 **This is important for decoding calcium signaling in develop-**  
30 **mental systems.**

31 A major challenge in deciphering spontaneous calcium ac-  
32 **tivity in tissues is the lack of computational models to quan-**  
33 **tify the multiplexed dynamics of the multiple regulators of**  
34  **$\text{Ca}^{2+}$  activity in multicellular systems. Here, we have over-**  
35 **come this bottleneck by developing and validating a multi-scale**  
36 **model of  $\text{Ca}^{2+}$  signaling pathway that identifies the key param-**  
37 **eters that determine transitions between tissue-wide calcium**  
38 **phenomena. This computational model provides key predic-**  
39 **tions on the underlying biophysical spatiotemporal patterning**  
40 **of parameters shaping calcium signaling dynamics needed to**  
41 **recapitulate the qualitative modes of calcium signaling dyn-**  
42 **amics that occur in epithelial systems: cellular  $\text{Ca}^{2+}$  spikes,**  
43 **multicellular transients,  $\text{Ca}^{2+}$  waves, or the global fluttering**  
44 **state (Fig. 1).**

45 A second question in the field is how these different spa-  
46 **tiotemporal modes of  $\text{Ca}^{2+}$  signaling impact downstream cel-**  
47 **lular or developmental processes. Here, we provide experimen-**  
48 **tal evidence that local intercellular  $\text{Ca}^{2+}$  transients are linked to**  
49 **insulin signaling that directs promotion of tissue growth. In**  
50 **contrast, promotion of intercellular  $\text{Ca}^{2+}$  waves through over-**  
51 **expression of the  $G\alpha_q$  subunit reduces wing size. Together**

## Significance Statement

Intercellular calcium signaling is critical for epithelial morphogenesis and homeostasis. However, how cytosolic calcium concentration dynamics are regulated at the multicellular level are poorly understood. Here, we show using a novel multiscale computational model that the spatial extent of intercellular calcium communication is controlled by two factors: i) the relative strength of global hormonal stimulation, and ii) the presence of a subset of “initiator cells” among a population of “standby cells” that are connected by gap junctions. Localized multicellular calcium signals are associated with maximal organ growth while persistent calcium waves inhibit overall organ growth. This mechanism explains the broad range of spatiotemporal calcium signaling dynamics that occurs during epithelial development.

The experimental data is imaged by Dharsan Soundarrajan<sup>2</sup>.

The authors declare no conflict of interest.

<sup>3</sup>To whom correspondence should be addressed. E-mail: [jjzartman@nd.edu](mailto:jjzartman@nd.edu)

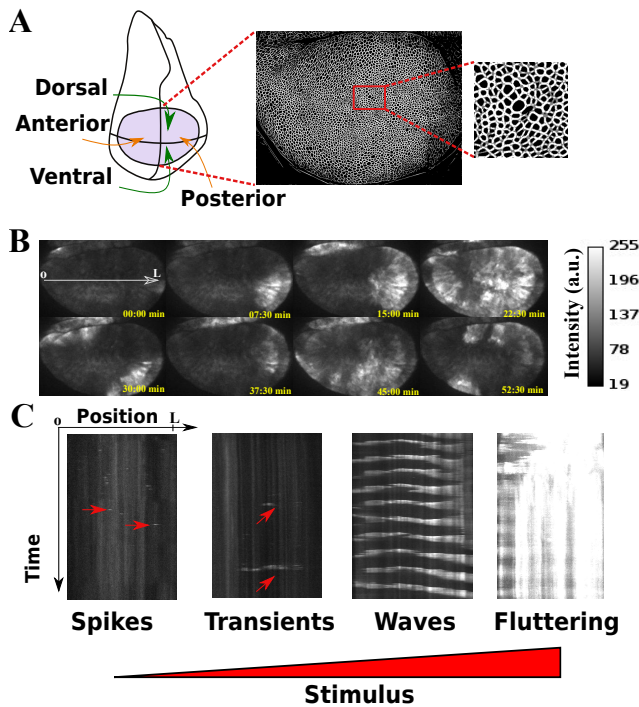

**Fig. 1. Four classes of spatiotemporal patterning of  $\text{Ca}^{2+}$  signaling dynamics in the wing imaginal disc** (A) Schematic of wing disc structure with the shaded pouch region defining the region of interest for the present study. (B) Time lapse of intercellular  $\text{Ca}^{2+}$  waves. (C) Ordinal progression of  $\text{Ca}^{2+}$  dynamics by increasing stimuli. Kymographs corresponding to  $\text{Ca}^{2+}$  spikes, intercellular  $\text{Ca}^{2+}$  transients (ICTs), intercellular  $\text{Ca}^{2+}$  waves (ICWs) and global fluttering. The red arrows indicate  $\text{Ca}^{2+}$  activity.

these results support a novel model that links tissue-level calcium signaling dynamics to overall organ size regulation, which we term the “ $\text{IP}_3/\text{Ca}^{2+}$  shunt” model. This hypothesis views  $\text{Ca}^{2+}$  signaling as a readout of two physiological states: stimulation of calcium signaling can be either growth promoting or growth inhibiting depending on the overall net level of stimulated calcium activity. In this model, limited levels of stimulation, leading to localized cellular spikes and limited intercellular calcium transients, provide a readout of growth stimulation. However, high levels of  $\text{G}\alpha_q/\text{Phospholipase C}$  activity are proposed to deplete  $\text{PIP}_2$  levels (16). This is likely due to substrate depletion of Phosphatidylinositol 4,5-bisphosphate  $\text{PIP}_2$  through promotion of  $\text{IP}_3$  generation and downstream  $\text{Ca}^{2+}$  activity by stimulation of Phospholipase C (PLC) activity. In turn, this would lead to reduced availability of  $\text{PIP}_2$  for conversion of  $\text{PIP}_2$  to Phosphatidylinositol-trisphosphate ( $\text{PIP}_3$ ), a key second messenger for stimulating protein kinase AKT and downstream growth promotion (17).

In this study, the *Drosophila* 3rd larval instar wing imaginal disc was used as a model platform to investigate the mechanisms governing  $\text{Ca}^{2+}$  signaling dynamics in epithelia. Fig. 1 summarizes the the experimental system and data. Different classes of patterns emerge at the tissue-level as the level of global stimulation increases:  $\text{Ca}^{2+}$  spikes, intercellular calcium transients (ICTs), intercellular calcium waves (ICWs) and global fluttering (15). However, a mechanistic understanding linking hormonal stimulation levels to transitions in these qualitative classes of organ-level signaling remains a key question.

Here, we took a hierarchical modeling approach to recapitulate classes of spatiotemporal  $\text{Ca}^{2+}$  patterns. At the cellular level, we first extended a  $\text{Ca}^{2+}$  signaling model described in (18) (refer to Fig. 2 for a summary) and modified the activation rate of  $\text{IP}_3$  receptors to match the experimental data. This new modification of the model was necessary to match the temporal characteristics of  $\text{Ca}^{2+}$  oscillations derived from the model with the experimental observations (Fig. S1-S4). Next, a chain of cells (1D-model) connected by gap junctions (GJs) were considered in the model (Fig. S5). This led to the main factors affecting propagation of  $\text{Ca}^{2+}$  signals were identified through analysis of kymographs. We then built a geometrically accurate 2D-model depicted in Fig. 4 A and identified the circumstances underlying various spatiotemporal  $\text{Ca}^{2+}$  dynamics. Finally, we validated the model with experiments. This enabled us to map the qualitative classes of  $\text{Ca}^{2+}$  signaling to functional outcomes of relative tissue growth. Each step in hierarchical modeling approach is briefly described in Material and Methods, while the full description is given in Supporting Information. Finally, we summarize the results and propose a model linking the  $\text{Ca}^{2+}$  signaling readout to size control.

## Results

### Accounting for calcium-dependent regulation of oscillation duration is required to explain experimental measurements of calcium dynamics.

In this study, we used a system of coupled Ordinary Differential Equations (ODEs) to model the basic  $\text{Ca}^{2+}$  signaling components (Fig. 2A, B, see also associated SI text). The baseline model is adapted from (18). At the single cell level, the experimental  $\text{Ca}^{2+}$  signals in the wing imaginal discs exhibited much longer periods and width at half maximum (WHM) compared to the original model of (18). To match the experimental data, we modified the dynamical equation of  $r$  as highlighted in Fig. 2 B. The variable  $r$  encodes the rate at which the  $\text{IP}_3$  receptors can be activated by  $\text{Ca}^{2+}$ . The proposed dynamical equation is given by

$$\frac{dr}{dt} = \frac{1}{\tau_{\max}} \frac{k_r^4 + c^4}{k_r^4} \left(1 - r \frac{K_i + c}{K_i}\right),$$

where in comparison to the original model of (18), the time scale of  $r$  is modulated by  $\text{Ca}^{2+}$ . The modification was necessary to match the temporal characteristics of the model with the experimental data. This modification enables simultaneous control over the frequency (by tuning  $\tau_{\max}$ ) and WHM (by tuning  $k_r$ ) of  $\text{Ca}^{2+}$  oscillations. Fig. 2 C, D summarizes the main features of the calibrated model. This suggests that  $\text{Ca}^{2+}$  can self-regulate frequency and WHM of its oscillations by modulating the activation rate of  $\text{IP}_3$  receptors. Additional characteristics of the model are described in supporting information Fig. S2, S3. A similar correction (modifying dynamics of  $r$  by modulating the corresponding time scale with  $\text{Ca}^{2+}$ ) with an emphasis on frequency calibration of  $\text{Ca}^{2+}$  signals is reported in (19). However, the underlying dynamical equations for modeling  $\text{Ca}^{2+}$  signaling reported there were slightly different. Specifically, in our model  $\text{IP}_3$  is described by a  $\text{Ca}^{2+}$  (and agonist) dependent ODE, while in their model  $\text{IP}_3$  is a pulse function.

In the single cell model,  $V_{\text{PLC}}$  encodes the maximum production rate of  $\text{IP}_3$  (refer to  $\text{IP}_3$  dynamics in Fig. 2B).  $V_{\text{PLC}}$  is a Hopf bifurcation parameter. Consequently, if  $V_{\text{PLC}}$  is above a critical threshold value ( $V_{\text{PLC}}^* = 0.78$ ),  $\text{Ca}^{2+}$  oscillations arise

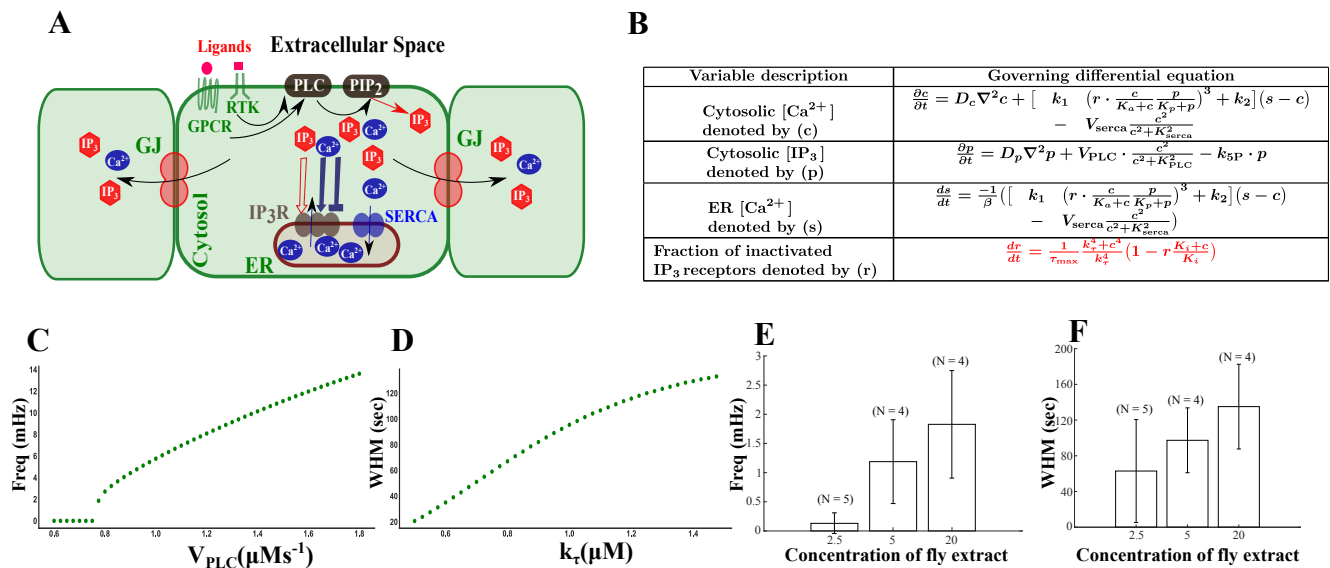

**Fig. 2. A modified computational model of calcium signaling captures key signatures of hormone-stimulated calcium transients** (A) Major components of  $Ca^{2+}$  toolkit; G protein-coupled receptors (GPCR), receptor tyrosine kinase (RTK), gap junctions (GJ), Inositol trisphosphate ( $IP_3$ ), diacylglycerol (DAG), Phospholipase C (PLC), Phosphatidylinositol 4,5-bisphosphate ( $PIP_2$ ), sarco/endoplasmic reticulum  $Ca^{2+}$ -ATPase (SERCA) and  $IP_3$  receptors ( $IP_3$  R). (B) The summary of baseline  $Ca^{2+}$  signaling model adapted from (18). The variables are concentration of cytosolic  $Ca^{2+}$ , concentration of  $IP_3$ , concentration of  $Ca^{2+}$  in Endoplasmic Reticulum (ER), and the fraction of  $IP_3$  receptors that has not been deactivated by  $Ca^{2+}$ . The permeability of  $Ca^{2+}$  and  $IP_3$  are denoted by  $D_c$  and  $D_p$ , respectively. More details on each dynamical equation and meaning of the parameters in the model are described in Supporting Information. The nominal values are summarized in Table S1. (C) Increasing  $V_{PLC}$  in the model increases frequency of oscillations in a single cell ( $D_c = D_p = 0$ ). This effect is similar to the original model (18). (D) Increasing  $k_{\tau}$  increases width at half maximum (WHM) of the  $Ca^{2+}$  oscillations in a single cell ( $D_c = D_p = 0$ ). For this simulation,  $V_{PLC} = 1.2$  is fixed, and  $k_{\tau}$  is varied. (E) Increasing the concentration of fly extract, a chemical stimulus of calcium signaling, increases the overall frequency of  $Ca^{2+}$  oscillations in the wing disc. Frequencies of  $Ca^{2+}$  dynamics from all the cells in the wing discs are averaged. and (F) Increasing the concentration of fly extract increases the overall width of half max (WHM) of  $Ca^{2+}$  oscillations. Error bars represent standard deviation.

139 (refer to Fig. S2). Otherwise, the  $Ca^{2+}$  levels remains at its rest value (basal level), and oscillations do not occur. Therefore,  $V_{PLC}$  is considered the parameter that encodes the chemical stimulus (FEX) for the simulations.

143 To study the behavior of  $Ca^{2+}$  signaling in coupled cells, we first considered a simplified model consisting of a chain of cells connected by gap junctions (GJs). The details of the 1D model are described in Supporting Information, and insights are summarized below. The 1D model demonstrates that when  $V_{PLC}$  is below  $V_{PLC}^*$ , but very close to it, a small amount of diffusive  $IP_3$  can trigger  $Ca^{2+}$  spikes (refer to Fig. S11). Furthermore, the diffusive  $IP_3$  should have enough strength (defined in terms of energy of diffusive  $IP_3$  signal) to trigger  $Ca^{2+}$  signaling (refer to Fig. S12). This observation reveals that when  $V_{PLC}$  is close to the Hopf bifurcation threshold, cells are much more prone to stimulate release of  $Ca^{2+}$  from the ER store into the cytosol due to diffusion of  $IP_3$ . This important finding leads the way to understand the underlying principles for emergence of  $Ca^{2+}$  patterns at the tissue level. Another prediction from the 1D model is that when the gap junction permeability is increased, the triggering of  $Ca^{2+}$  signals in neighborhood cells occur faster. Therefore, permeability of GJs affect the speed of  $Ca^{2+}$  propagation. This is due to the fact that the accumulated  $IP_3$ , which diffuses through GJs, is the key for triggering  $Ca^{2+}$  release from internal stores (See Supporting Information Fig. S5).

165 **Gap junction communication coordinates and inhibits tissue-level  $Ca^{2+}$  signaling activity.** Next, we built a geometrically accurate tissue model that consists of a collection of cells connected by GJ's. Each cell has its own dynamical equations describing the  $Ca^{2+}$  signaling toolkit with additional terms

170 corresponding to diffusion of  $IP_3$  and  $Ca^{2+}$  (Fig. 2 B). The 2D mathematical model suggests that the particular form of tissue-scale  $Ca^{2+}$  signaling present in the epithelium depends on two factors: (i) the spatial organization of  $IP_3$  production with respect to the Hopf bifurcation, and (ii) the relative strength of gap junction communication. Here, we provide experimental results to validate key predictions of the model. Throughout the rest of this study,  $D_p$  and  $D_c$  represent the effective diffusivity of  $IP_3$  and  $Ca^{2+}$ , respectively.

179 **Gap junction inhibition in the presence of a stimulus leads to asynchronous  $Ca^{2+}$  signaling.** Cells exhibit oscillatory  $Ca^{2+}$  dynamics with no coordination among them when GJs were blocked in the presence of hormonal stimulation (FEX stimulation, Movies S1-S2). These results demonstrate the main role of gap junction communication is in the coordination of activity of spatiotemporal  $Ca^{2+}$  patterns between cells in the tissue. When the gap junctions are not blocked, a diverse range of spatiotemporal patterns emerges in the experimental data ( Fig. 1C).

187 **Inhibition of gap junction communication increases  $Ca^{2+}$  spikes.** The experiment summarized in Fig. 3 provides evidence that reduction of gap junction communication increases  $Ca^{2+}$  signaling within individual cells under low levels of stimulation. Specifically, both control and test discs were cultured without using any external chemical stimulus such as FEX. The control shows almost no  $Ca^{2+}$  activity (Fig. 3A). However, when gap junction communication is blocked in the tissue,  $Ca^{2+}$  spikes appear (Fig. 3B). Fig. 3C represents the simulation results to recapitulate the transition from no  $Ca^{2+}$  activity to the emergence of spikes by decreasing gap junction permeability.

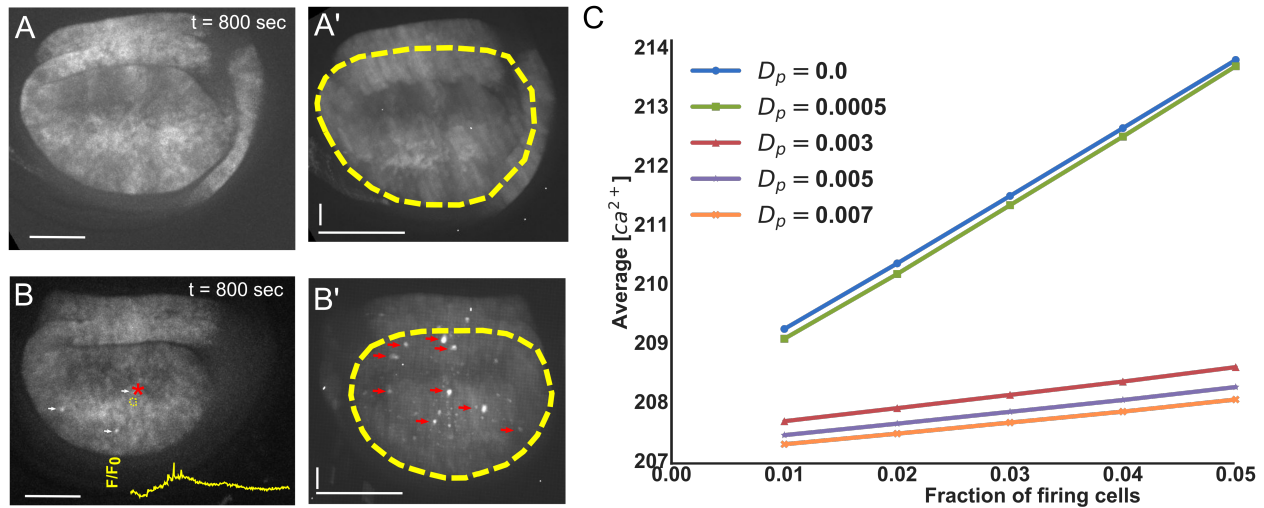

**Fig. 3. Gap junction communication decreases Ca<sup>2+</sup> spikes in the wing disc cells.** A-B) Montages from ex vivo time-lapse movies of *nub>GCaMP6f × UAS-RyR<sup>RNAi</sup>* (control) wing discs. A) Wing discs were imaged in Grace's low ecdysone media for 1 hr at 10 sec intervals (20). Under this condition, we observed no Ca<sup>2+</sup> activity in the wing disc cells. A') t-projection of the time lapse stack. The wing disc boundary is indicated with the yellow dashed line. B) Gap junction communication was blocked by culturing wing discs in Grace's low ecdysone media with 100mM of Carbenoxolone (Cbx). We observed a significant number of Ca<sup>2+</sup> spikes in the 1 hr time interval when GJs were inhibited. B') t-projection of the time lapse movies. Yellow dotted lines indicated disc boundary. Scale bar refers to 100μm respectively. (C) Simulation result to identify the transition from no Ca<sup>2+</sup> activity to spikes. For this simulation, most of the cells have V<sub>PLC</sub> below the Hopf threshold (no stimulation), while a tiny fraction of cells (x-axis) are slightly above the Hopf threshold (V<sub>PLC</sub> = 0.8). Then, the average Ca<sup>2+</sup> levels over the tissue under variable gap junction permeability was computed. When GJs are blocked (D<sub>p</sub> = 0), the average Ca<sup>2+</sup> levels of the tissue are higher. This increase is due to stimulation of cellular Ca<sup>2+</sup> spikes. When D<sub>p</sub> is increased, the Ca<sup>2+</sup> levels drop to basal level. For all cases, D<sub>c</sub> = 0.1D<sub>p</sub> (21). The units of average Ca<sup>2+</sup> concentration is μM. Horizontal scale bars in A,A',B,B' represent 100 μm and the vertical scale bar in A' and B' represent 6 min. Montages in A' and B' were slightly adjusted for brightness and contrast for clarity.

Most of the cells have V<sub>PLC</sub> below the Hopf bifurcation threshold to simulate no external stimulus, except a tiny fraction of cells that have V<sub>PLC</sub> slightly greater than the bifurcation threshold. We then varied the gap junction permeability and computed the average Ca<sup>2+</sup> levels over the tissue by computing the average integrated Ca<sup>2+</sup> levels

$$\frac{1}{N} \sum_{i=1}^N \int_0^T c_i(t) dt.$$

189 Here,  $N$  is the total number of cells in the tissue,  $T$  is the  
190 simulation period (1 hour), and  $c_i(t)$  is the Ca<sup>2+</sup> signal for  
191 individual cells. When gap junctions are blocked, the average  
192 Ca<sup>2+</sup> levels are higher. This increase is due to the occurrence  
193 of spontaneous Ca<sup>2+</sup> spikes (Fig. 3C). When gap junctions are  
194 blocked, the IP<sub>3</sub> produced in those cells, which are set to be  
195 slightly above the bifurcation threshold triggers Ca<sup>2+</sup> spikes  
196 (there is no diffusion of IP<sub>3</sub> to neighboring cells). When gap  
197 junctions are open, the produced IP<sub>3</sub> diffuses to neighboring  
198 cells, and no Ca<sup>2+</sup> spike can be triggered (due to insufficient  
199 accumulation of IP<sub>3</sub>). Thus, gap junction communication  
200 effectively raises the threshold needed for significant release  
201 of Ca<sup>2+</sup> into the cytosol. This suggests that gap junction  
202 communication acts to 'inhibit' calcium signaling. Below,  
203 we discuss the necessary conditions for the main classes of  
204 Ca<sup>2+</sup> patterns in the presence of a stimulus.

205 **The distribution of V<sub>PLC</sub> with respect to the Hopf bifurcation**  
206 **governs transitions between spatiotemporal classes of tis-**  
207 **sue-level signaling dynamics.** In experimental data Fig. 1 C,  
208 different tissue-level patterns of Ca<sup>2+</sup> signaling are observed.  
209 The main classes include (i) Ca<sup>2+</sup> local spikes, (ii) intercellular

Ca<sup>2+</sup> transients (ICTs), (iii) intercellular Ca<sup>2+</sup> waves (ICWs), 210  
and (iv) global fluttering in ordinal progression by increasing 211  
stimulus. The first three classes have a common feature: a 212  
small fraction of cells in the tissue that serve as initiation sites 213  
for the onset of Ca<sup>2+</sup> signals. However, in the global fluttering 214  
mode, most of the cells in the disc are in active state. Fig. 4 215  
D-G summarizes the simulation results for spikes, ICTs, ICWs 216  
and global fluttering (also refer to SI simulation movies S4, 217  
S6, S8, S13). These results demonstrate that the spatial distri- 218  
bution of V<sub>PLC</sub>, with respect to the Hopf bifurcation threshold, 219  
is the key factor that determines the specific form of intercel- 220  
lular Ca<sup>2+</sup> signaling. Fig. 4 C illustrates the distribution of 221  
V<sub>PLC</sub>, which leads to either Ca<sup>2+</sup> spikes, ICTs or ICWs. As 222  
the distribution of IP<sub>3</sub> production rates become closer to the 223  
Hopf bifurcation threshold, the spatial extent of Ca<sup>2+</sup> signaling 224  
becomes larger. In other words, a subpopulation of initiator 225  
cells regulates the range of signal transmission by organizing 226  
IP<sub>3</sub> production rate with respect to a Hopf bifurcation and in 227  
the presence of gap junction communication. This explains the 228  
ordinal progression of Ca<sup>2+</sup> dynamics observed as the concen- 229  
tration of chemical stimulus such as FEX is increased. Fig. 4 230  
H shows how Ca<sup>2+</sup> waves can form based on patterning of 231  
maximum production of PLC activity (V<sub>PLC</sub>). As depicted in 232  
Fig. S20, reducing V<sub>PLC</sub> in a stripe along A/P axis, while 233  
keeping the rest of cells near Hopf bifurcation also leads to 234  
spiral form of Ca<sup>2+</sup> waves (refer to SI simulation movie S10). 235  
An example of such an experimental observed spiral wave is 236  
depicted in the SI movie S9. 237

**Gα<sub>q</sub> overexpression in the absence of stimulus induces** 238  
**Ca<sup>2+</sup> waves and leads to reduced wing size.** To further con- 239  
firm our prediction that the position of V<sub>PLC</sub> with respect 240

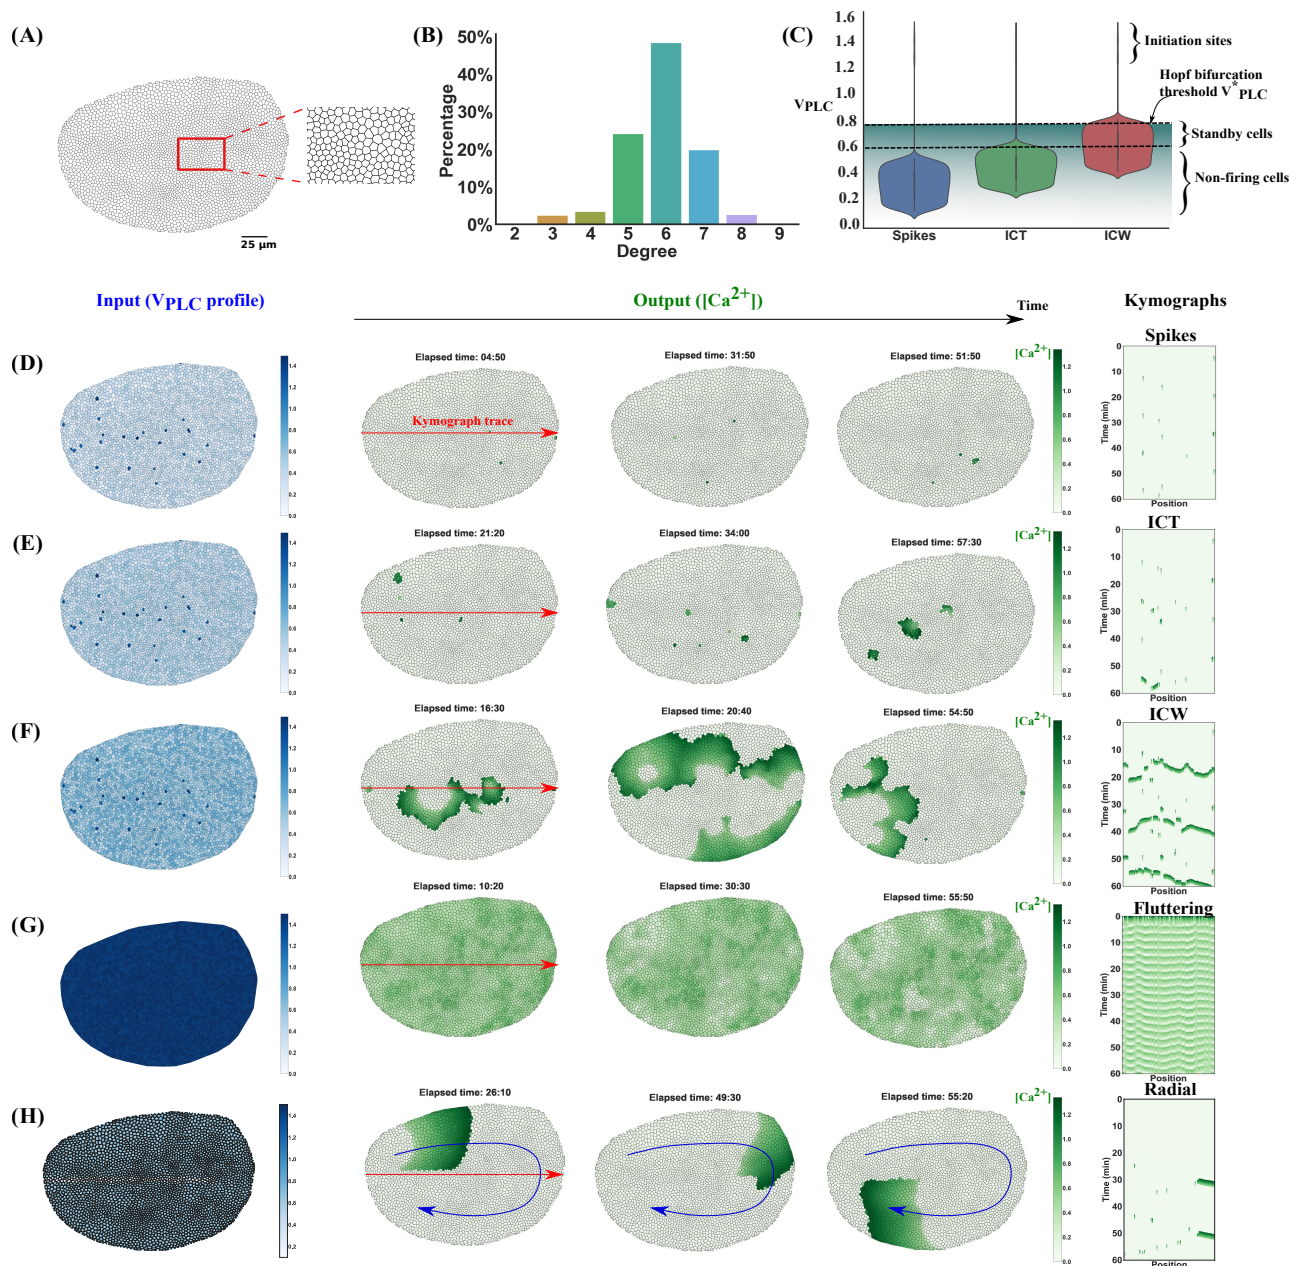

**Fig. 4. Tuning global stimulation strength governs the spatial extent of intercellular  $\text{Ca}^{2+}$  communication.** (A) An experimental image of a third instar wing disc served as a template for defining the simulated tissue. In brief, cells were segmented from a wing disc. Centroids of segmented cells were used to define cellular positions in the simulated wing disc. (B) A Voronoi tessellation followed by multiple rounds of Lloyd's relaxation (22) was used to define a template wing disc that matches the experimentally observed network topology (refer to Fig. 1 (A) for experimental image). For each cell in the tissue the set of ODEs based on the proposed model is solved Fig. 1 B, while neighboring cells exchange  $\text{Ca}^{2+}$  and  $\text{IP}_3$  through GJs. (C) Distribution of  $V_{\text{PLC}}$  with respect to a Hopf bifurcation for three main classes of  $\text{Ca}^{2+}$  dynamics. All three classes including local spikes, ICTs and ICWs have a common characteristics: a small fraction of cells with high values of  $V_{\text{PLC}}$  which are the initiation sites. However, distribution of  $V_{\text{PLC}}$  in rest of the cells determines the extent of intercellular  $\text{Ca}^{2+}$  signaling: (i) when the majority of cells have  $V_{\text{PLC}}$  much smaller than  $V_{\text{PLC}}^*$ , local spikes emerge, (ii) if a significant fraction of cells have low  $V_{\text{PLC}}$ , but close to  $V_{\text{PLC}}^*$ , then ICTs emerge, (iii) if most of the cells have  $V_{\text{PLC}}$  in close vicinity of  $V_{\text{PLC}}^*$ , then ICWs emerge. Depending on  $V_{\text{PLC}}$ , each individual cell can be classified as (i) a non-firing cell, which has low levels of  $\text{IP}_3$  production (small  $V_{\text{PLC}}$ ) and hinders long-range signal propagation, (ii) a standby cell with  $V_{\text{PLC}}$  near Hopf bifurcation  $V_{\text{PLC}}^*$  capable of firing  $\text{Ca}^{2+}$  signaling by a small amount of diffusive  $\text{IP}_3$  and (iii) initiator cells, which exhibit high values of  $V_{\text{PLC}}$ , likely through an increased receptivity to hormonal signaling. The shaded area in panel (C) highlights the region below the Hopf threshold where the standby and non-firing cells are located. Each row in (D-H) contains the  $\text{IP}_3$  production rate profile ( $V_{\text{PLC}}$  levels for individual cells), three frames corresponding to time lapse of the simulation window (1 hour) and the corresponding kymograph along the red arrow. (D) Individual  $\text{Ca}^{2+}$  spikes occur when the majority of cells have  $\text{IP}_3$  production rates that are very low and away from the Hopf bifurcation threshold. (E) ICTs occur when the majority of cells have  $\text{IP}_3$  production rates that are low but close to Hopf bifurcation threshold. (F) ICWs occur when the majority of cells have  $\text{IP}_3$  production rates that are in vicinity of Hopf bifurcation threshold. For panel (D-F), the initiation sites are roughly 1% of total number cells and spatially distributed at random throughout the tissue (same random locations for each class). As depicted in leftmost column, while (D), (E) and (F) have small number of initiation sites, the  $\text{IP}_3$  production rate in rest of the cells increases gradually. (G) Global fluttering occurs when almost all the cells have high  $\text{IP}_3$  production rate and higher values of  $K_{\text{serca}}$ . (H) Spiral  $\text{Ca}^{2+}$  waves (along the blue arrow) emerge by carefully chosen  $V_{\text{PLC}}$  profile. The units for concentration of  $\text{Ca}^{2+}$  are in  $\mu\text{M}$ .

241 to Hopf bifurcation affects the overall  $Ca^{2+}$  dynamics, we ex-  
 242 perimentally tested the effect of overexpressing  $G\alpha_q$  on the  
 243 resulting  $Ca^{2+}$  dynamics using the Gal4/UAS system (23, 24).  
 244  $G\alpha_q$  is one of the subunits of the G-protein that dissociates  
 245 in response to GPCR activation. Dissociated  $G\alpha_q$  activates  
 246 phospholipase C to convert  $PIP_2$  to DAG and  $IP_3$  (25). Hence,  
 247 altering the levels of  $G\alpha_q$  increases activation of PLCs in the  
 248 cytosol. We observed the robust formation of intercellular  
 249  $Ca^{2+}$  waves independent of FEX in the media (Fig. 5B, B').  
 250 The waves were periodic in nature and were similar to the  
 251 FEX-induced waves. We did not observe significant global  
 252 fluttering or spikes when we overexpressed  $G\alpha_q$  in the wing  
 253 disc. We also observed that overexpression of  $G\alpha_q$  resulted in  
 254 a decrease in the overall size of the wing (Fig. 5 B"). Taken  
 255 together, our results indicate that the intercellular  $Ca^{2+}$  waves  
 256 is a consequence of  $G\alpha_q$  signaling, and that the relative level  
 257 of stimulated  $Ca^{2+}$  signaling activities plays a key role in de-  
 258 termining the final size of the adult wing.

259 **Insulin signaling increases wing size but only generates lo-**  
 260 **calized  $Ca^{2+}$  signals.** In addition to FEX, we asked whether  
 261 other ligands added to the organ culture affects  $Ca^{2+}$  activity.  
 262 In addition to FEX, insulin is added often to organ culture  
 263 media to stimulate cell proliferation (26, 27). Hence, we asked  
 264 whether activation of insulin signaling regulates  $Ca^{2+}$  activity.  
 265 Using GAL4/UAS system, we upregulated and downregulated  
 266 insulin signaling in the wing disc. Strikingly, we observed that  
 267 activation of insulin signaling results in localized  $Ca^{2+}$  spikes  
 268 and ICTs (Fig. 5 C, C'). However, we did not observe many  
 269 ICWs. As a second experiment, we varied the concentration  
 270 of insulin and found that a higher concentration of insulin  
 271 increased the number of spikes and ICTs. However, we did not  
 272 see the generation of periodic ICWs. In contrast, no spikes  
 273 were observed when insulin signaling was inhibited by express-  
 274 ing a dominant negative form of the insulin receptor (Fig. 5 D,  
 275 D')(28). Furthermore, we did not observe periodic ICWs when  
 276 insulin signaling was constitutively activated (Fig. 5 C, C')(29).  
 277 Thus, our results suggest that the localized  $Ca^{2+}$  spikes ob-  
 278 served ex vivo is activated by insulin signaling. Upregulation  
 279 of insulin signaling increases the wing size (Fig. 5 C"). Thus,  
 280 localized  $Ca^{2+}$  signal correlates with increased wing size in  
 281 contrast to global waves in response to GPCR signaling, which  
 282 correlates with decreased wing size.

283 **Discussion.** The main finding of this work is the discovery of  
 284 a parsimonious explanation that links global hormonal stimu-  
 285 lation of calcium signaling to emergent spatiotemporal classes  
 286 of signaling dynamics (Fig. 6). The model predicts that the  
 287 distribution of  $IP_3$  production rate with respect to a Hopf  
 288 bifurcation in the presence of gap junction communication  
 289 determines the mode of  $Ca^{2+}$  signaling in epithelia, and each  
 290 mode has a specific spatial range. As a consequence, the spa-  
 291 tial range of  $Ca^{2+}$  signaling can be controlled by tuning tissue  
 292 level  $IP_3$  production rates. We showed that (i) upregulation  
 293 of insulin signaling induces localized  $Ca^{2+}$  signals with a corre-  
 294 sponding increase in final wing size and (ii)  $G\alpha_q$  overexpression  
 295 in the absence of stimulus induces global  $Ca^{2+}$  waves and  
 296  $G\alpha_q$  overexpression leads to reduced wing size. To eluci-  
 297 date the impact of different modes of  $Ca^{2+}$  signaling on tissue  
 298 growth, the computational model and experimental evidences  
 299 provide key support for the " $IP_3$ /  $Ca^{2+}$  shunt" hypothesis of  
 300 tissue size regulation. In this model, tuning  $IP_3$  production lev-

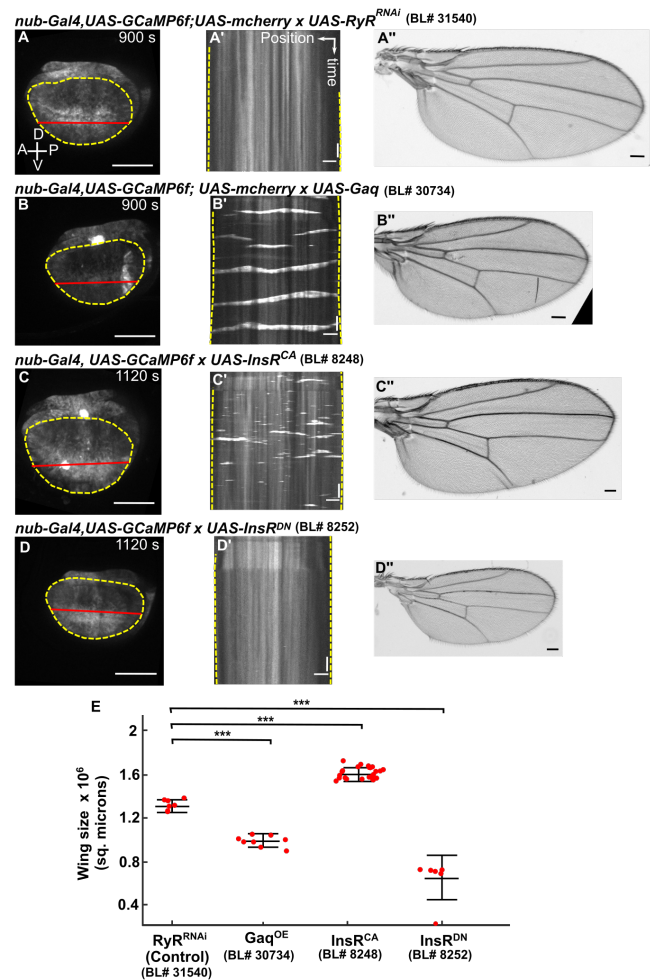

301 **Fig. 5. GPCR and insulin signaling differentially regulates the spatial patterns**  
 302 **of  $Ca^{2+}$  independent of FEX.** A-D) Montages from the ex vivo time-lapse movies,  
 303 and A'-D') kymographs of the corresponding time-lapse movies. A"-D") Adult wings  
 304 from the indicated genetic perturbation. In the control wing disc (A-A') cultured in  
 305 Grace's low 20E media for 1 hr, we did not observe  $Ca^{2+}$  waves or  $Ca^{2+}$  transients.  
 306 Overexpression of  $G\alpha_q$  in the wing disc (B-B') resulted in the formation of periodic  
 307 intercellular  $Ca^{2+}$  waves. The resulting adult wing from overexpression of  $G\alpha_q$  was  
 308 smaller when compared to controls (A"-B"). Up-regulating insulin signaling in the  
 309 wing disc (C-C'), which significantly increases wing size, resulted in the formation of  
 310  $Ca^{2+}$  spikes or  $Ca^{2+}$  transients but not waves. Down-regulating insulin signaling in  
 311 the wing disc (D-D'), which significantly reduces organ size, prevented  $Ca^{2+}$  activity in  
 312 the wing disc (A"-D"). E) Quantification of the adult wing sizes for the indicated  
 313 genetic perturbations. Scale bars in A-D) and A"-D") represent 100  $\mu m$ . Horizontal  
 314 scale bars in A'-D') represent 50  $\mu m$ . Vertical scale bars in A'-D') represent 6 min. Student  
 315 t-test was performed. \*\*\*  $p < 0.001$ . Yellow dotted lines indicate pouch boundaries.  
 316 Red lines indicate xy positions in the kymograph. Labels in E) represent crosses of  
 317 UAS-*transgene* to parental *nub>GCaMP6f* in the case of InsR<sup>CA</sup> and InsR<sup>DN</sup> or  
 318 *nub>GCaMP6f;mcherry* in the case of RyR<sup>RNAi</sup> or Gαq. The UAS lines used are UAS  
 319 RyR<sup>RNAi</sup> (BL#31540), UAS InsR<sup>CA</sup> (BL#8248), UAS InsR<sup>DN</sup> (BL#8252) and UAS  
 320 Gq (BL#30734) respectively.

301 els enables control of the common substrate allocation between  
 302 two different pathways, namely,  $Ca^{2+}$  signaling pathway and  
 303 the  $PI_3K/AKT$  signaling pathway (16).  $PIP_2$  is the precursor  
 304 for  $IP_3$  and also modulate  $PI_3K/AKT$  pathway (30). If more  
 305  $PIP_2$  is allocated for stimulating  $Ca^{2+}$  signaling (which induces  
 306 global  $Ca^{2+}$  activity), less  $PIP_2$  is available for  $PI_3K/AKT$   
 307 pathway (which inhibits the growth). This proposition paves

308 the way on how to tune one signaling pathway to control another signaling pathway (e.g. PI<sub>3</sub>K/AKT), which are coupled at the substrate level.

311 A recent study on signal transmission in a bacterial community suggests that the transition from localized short-range signaling to global community-level communication is associated with a cost-benefit balance (31). In that context, long range signaling increases the overall fitness of the community against chemical attack, while the cost to individual cells is a reduction in growth rate. The proposed model in this work can also be characterized as a cost-benefit trade offs within the context of tissue level Ca<sup>2+</sup> signaling. For instance, it has been suggested that the fast calcium waves facilitate migration and proliferation of the healing cells by inhibiting excessive apoptotic response during wound healing in epithelia (32). Fig. 6 summarizes the effects of different Ca<sup>2+</sup> signaling modes in the context of tissue growth and development. Minimal calcium activity, as is observed when insulin signaling is inhibited, correlates with reduced growth, whereas intermediate levels of calcium signaling accompanies strong activation of insulin signaling. However, such signaling does not lead to recurring global calcium waves. GPCR-mediated ICWs lead to a net reduction in tissue growth and therefore are growth inhibiting. Within the context of the "IP<sub>3</sub>/Ca<sup>2+</sup> shunt" model, the strong induction of calcium waves will reduce the level of PIP<sub>2</sub>, a key substrate for growth. This analysis thus motivates future experimental work in this area, which will require careful quantification of PIP<sub>2</sub> and PIP<sub>3</sub> under genetic perturbations of GPCR signaling. Additionally, future work is needed to quantify the metabolic benefits and costs of calcium signaling during tissue growth.

339 A possible alternative interpretation would incorporate the coupling of calcium signaling dynamics to tissue growth through cell mechanics. A starting point of the proposed coupling equations can follow the recent proposed model where it was shown that calcium signals and contractions are coupled via a two-way mechanochemical feedback mechanism during apical constriction (33). Finally, a major implication for this work is the translational potential of deliberately shaping calcium signaling activities through spatiotemporally controlled modulation of calcium signaling dynamics in tissues, through a combination of global modulation and local perturbations, to treat or inhibit diseases such as cancer and birth defects.

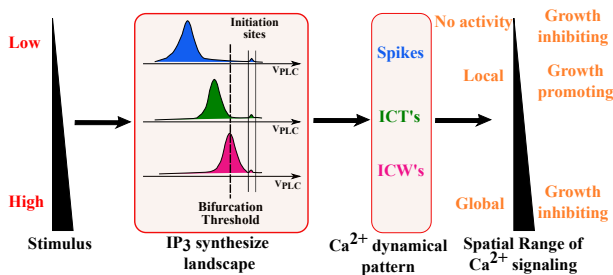

340 **Fig. 6.** Summary of key findings based on the proposed model for tissue-level regulation of Ca<sup>2+</sup> dynamics in epithelial tissues. The spatial range of tissue-level Ca<sup>2+</sup> signaling is determined by how the IP<sub>3</sub> production is organized with respect to a Hopf bifurcation threshold throughout the tissue. Localized Ca<sup>2+</sup> transients can be associated with insulin-stimulated growth. Global Ca<sup>2+</sup> signaling inhibits growth.

## 351 Materials and Methods

352 In this study, the *Drosophila* wing imaginal disc in the late larval stages was used as a model platform to investigate the mechanisms governing Ca<sup>2+</sup> signaling dynamics in epithelia (15, 34, 35). Wing imaginal discs are geometrically simple epithelial organs growing inside the larva. Imaginal discs form different parts of the adult wing and thorax after metamorphosis (36). We restrict the spatial domain of simulations to the wing pouch area, which will form the wing blade, as it is well defined through many genetic studies (see Fig. 1).

361 **Fly stocks.** A *nub-GAL4*, *UAS-GCaMP6f* reporter tester line was created by recombining *nub-GAL4* and *UAS-GCaMP6f* lines (34). Additionally, a second tester line was used that also includes *UAS-mcherry*. Gene perturbations were generated by crossing the tester line to either RNAi-based transgenic lines (*UAS-Gene X<sup>RNAi</sup>*) or gene overexpression (*UAS-Gene X*). The following *UAS* transgenic lines were used: *UAS-RyR<sup>RNAi</sup>* (BL#31540)(37), *UAS-Gq*(BL#30734)(38), *UAS-InsR<sup>CA</sup>* (BL#8248)(39), *UAS-InsR<sup>DN</sup>* (BL#8252)(40). Progeny wing phenotypes are from F1 male progeny emerging from the *nub-Gal4*, *UAS-GCaMP6f/CyO* x *UAS-X* cross or *nub-Gal4*, *UAS-GCaMP6f/CyO*; *UAS-mcherry* x *UAS-X* cross. Flies were raised at 25C and on a 12-hour light cycle.

373 **Live imaging.** Wandering third instar larva approximately 6 days after egg laying were dissected in ZB media with 15% fly extract to obtain wing discs (41). ZB media + 15% fly extract contains 79.4% (v/v) ZB media, 0.6% (v/v) of 1 mg/ml of insulin (Sigma aldrich), 15% ZB-based fly extract and 5% penicillin/streptomycin (Gibco). Wing discs were loaded into the previously described REM-Chip (35) and imaged using Nikon Eclipse Ti confocal microscope with a Yokogawa spinning disc and MicroPoint laser ablation system. Image data were collected on an IXonEM+colled CCD camera (Andor technology, South Windsor, CT) using MetaMorph v7.7.9 software (Molecular devices, Sunnyvale, CA). Discs were imaged at three z-planes with a step size of 10 μm, 20x magnification and 10-seconds intervals for a total period of one hour, with 200 ms exposure time, and 50 nW, 488 nm laser exposure at 44 % laser intensity. We blocked gap junction by inhibiting innexin-2 using Carbenoxolone (Cbx, Sigma Aldrich) drug (34). Wing discs were incubated in ZB + 15% FEX with 30 μM Cbx for one hour before imaging. To induce Ca<sup>2+</sup> transients, we imaged wing discs in ZB media + 2.5 % FEX. Ca<sup>2+</sup> waves were induced by imaging the wing disc in ZB media + 15% FEX. Ca<sup>2+</sup> fluttering was observed when discs were imaged in ZB media + 40% FEX respectively.

394 **Quantification of adult wings.** Total wing area was measured using imageJ. We traced the wing margin by following veins L1 and L5 and the wing hinge region was excluded from the size analysis.

397 **Intracellular model.** A modified model of Ca<sup>2+</sup> signaling toolkit based on the Politi *et al.* model (18) was utilized in this work. The model is summarized in Fig. 2. A more comprehensive description can be found in Supporting Information. To recapitulate the same time resolution as the experiments, the simulation time is 1 hour and for generating videos, samples are obtained every 10s.

403 **Tissue model.** For constructing a realistic model of the tissue, we used experimental images of a wing pouch to build an accurate model of the tissue structure. Fig. 4 A,B depicts the structure of the tissue used for simulations and the statistics of the corresponding network. More detail on the geometry of the model are discussed in Supporting Information.

409 **Intercellular model.** The realistic model of the tissue was combined with proposed intracellular model. Diffusion of the second messengers IP<sub>3</sub> and Ca<sup>2+</sup> between adjacent cell was incorporated into the 2D model. Therefore, the tissue level model is a system of coupled ODE's. A complete description of the model is provided in SI materials.

415 **Data availability.** All the data and simulation codes are available upon request.

- 417 **ACKNOWLEDGMENTS.** The work in this paper was supported  
418 by NIH Grant R35GM124935 and NSF Award CBET-1553826.  
419 The authors gratefully acknowledge the Notre Dame Center for  
420 Research Computing (CRC) for providing computational facilities.  
421 We would like to thank Alexander Dowling and Maria Unger for  
422 helpful discussions, and members of the Zartman lab for their  
423 supports and critiques.
- 424 1. Giorgi C, Danese A, Missiroli S, Patergnani S, Pinton P (2018) Calcium dynamics as a ma-  
425 chine for decoding signals. *Trends in cell biology* 28(4):258–273.
  - 426 2. Clapham DE (2007) Calcium signaling. *Cell* 131(6):1047–1058.
  - 427 3. Cuthbertson KR, Cobbold P (1985) Phorbol ester and sperm activate mouse oocytes by  
428 inducing sustained oscillations in cell  $\text{Ca}^{2+}$ . *Nature* 316(6028):541.
  - 429 4. Berridge MJ (2005) Unlocking the secrets of cell signaling. *Annu. Rev. Physiol.* 67:1–21.
  - 430 5. Orrenius S, Zhivotovskiy B, Nicotera P (2003) Calcium: Regulation of cell death: the calcium–  
431 apoptosis link. *Nature reviews Molecular cell biology* 4(7):552.
  - 432 6. Wei C, et al. (2009) Calcium flickers steer cell migration. *Nature* 457(7231):901.
  - 433 7. Carafoli E (2002) Calcium signaling: a tale for all seasons. *Proceedings of the National*  
434 *Academy of Sciences* 99(3):1115–1122.
  - 435 8. Martin N, Bernard D (2017) Calcium signaling and cellular senescence. *Cell calcium.*
  - 436 9. Humeau J, et al. (2017) Calcium signaling and cell cycle: progression or death. *Cell calcium.*
  - 437 10. La Rovere RM, Roest G, Bulytynck G, Parys JB (2016) Intracellular  $\text{Ca}^{2+}$  signaling and  
438  $\text{Ca}^{2+}$  microdomains in the control of cell survival, apoptosis and autophagy. *Cell calcium*  
439 60(2):74–87.
  - 440 11. Parekh AB (2011) Decoding cytosolic  $\text{Ca}^{2+}$  oscillations. *Trends in biochemical sciences*  
441 36(2):78–87.
  - 442 12. Ohno Y, Otaki JM (2015) Spontaneous long-range calcium waves in developing butterfly  
443 wings. *BMC developmental biology* 15(1):17.
  - 444 13. Mammano F, Bortolozzi M (2018)  $\text{Ca}^{2+}$  signaling, apoptosis and autophagy in the develop-  
445 ing cochlea: milestones to hearing acquisition. *Cell calcium* 70:117–126.
  - 446 14. Ceriani F, Pozzan T, Mammano F (2016) Critical role of atp-induced atp release for  $\text{Ca}^{2+}$   
447 signaling in nonsensory cell networks of the developing cochlea. *Proceedings of the National*  
448 *Academy of Sciences* 113(46):E7194–E7201.
  - 449 15. Brodskiy PA, et al. (2019) Decoding calcium signaling dynamics during Drosophila wing disc  
450 development. *Biophysical journal* 116(4):725–740.
  - 451 16. Loew LM (2007) Where does all the pip2 come from? *The Journal of physiology* 582(3):945–  
452 951.
  - 453 17. Czech MP (2000) Pip2 and pip3: complex roles at the cell surface. *Cell* 100(6):603–606.
  - 454 18. Politi A, Gaspers LD, Thomas AP, Höfer T (2006) Models of  $\text{IP}_3$  and  $\text{Ca}^{2+}$  oscillations: fre-  
455 quency encoding and identification of underlying feedbacks. *Biophysical journal* 90(9):3120–  
456 3133.
  - 457 19. Sneyd J, et al. (2017) On the dynamical structure of calcium oscillations. *Proceedings of the*  
458 *National Academy of Sciences* p. 201614613.
  - 459 20. Dye NA, et al. (2017) Cell dynamics underlying oriented growth of the drosophila wing imagi-  
460 nal disc. *Development* 144(23):4406–4421.
  - 461 21. Long J, Deymier PA, Runge K, Hoying JB (2014) Regulation of the frequency and wavelength  
462 of calcium waves propagating in networks of interconnected cells: A simulation study. *Trends*  
463 *in Cell & Molecular Biology* 9:19–33.
  - 464 22. Lloyd S (1982) Least squares quantization in pcm. *IEEE transactions on information theory*  
465 28(2):129–137.
  - 466 23. Brand AH, Perrimon N (1993) Targeted gene expression as a means of altering cell fates and  
467 generating dominant phenotypes. *Development* 118(2):401–415.
  - 468 24. Duffy JB (2002) Gal4 system in drosophila: a fly geneticist's swiss army knife. *genesis* 34(1-  
469 2):1–15.
  - 470 25. Litosch I (2016) Decoding  $\text{G}\alpha\text{q}$  signaling. *Life sciences* 152:99–106.
  - 471 26. Wyss C (1982) Ecdysterone, insulin and fly extract needed for the proliferation of normal  
472 drosophila cells in defined medium. *Experimental cell research* 139(2):297–307.
  - 473 27. Zartman J, Restrepo S, Basler K (2013) A high-throughput template for optimizing drosophila  
474 organ culture with response-surface methods. *Development* 140(3):667–674.
  - 475 28. Hevia CF, López-Varea A, Esteban N, de Celis JF (2017) A search for genes mediating  
476 the growth-promoting function of  $\text{tgf}\beta$  in the drosophila melanogaster wing disc. *Genetics*  
477 206(1):231–249.
  - 478 29. Brogiolo W, et al. (2001) An evolutionarily conserved function of the drosophila insulin recep-  
479 tor and insulin-like peptides in growth control. *Current biology* 11(4):213–221.
  - 480 30. Xu C, Watras J, Loew LM (2003) Kinetic analysis of receptor-activated phosphoinositide  
481 turnover. *The Journal of cell biology* 161(4):779–791.
  - 482 31. Larkin JW, et al. (2018) Signal percolation within a bacterial community. *Cell systems*  
483 7(2):137–145.
  - 484 32. Justet C, Hernández JA, Torriglia A, Chifflet S (2016) Fast calcium wave inhibits excessive  
485 apoptosis during epithelial wound healing. *Cell and tissue research* 365(2):343–356.
  - 486 33. Kaouri K, Maini PK, Skourides P, Christodoulou N, Chapman SJ (2019) A simple  
487 mechanochemical model for calcium signalling in embryonic epithelial cells. *Journal of math-*  
488 *ematical biology* pp. 1–34.
  - 489 34. Narciso C, et al. (2015) Patterning of wound-induced intercellular  $\text{Ca}^{2+}$  flashes in a devel-  
490 oping epithelium. *Physical biology* 12(5):056005.
  - 491 35. Narciso CE, Contento NM, Storey TJ, Hoelzle DJ, Zartman JJ (2017) Release of applied me-  
492 chanical loading stimulates intercellular calcium waves in drosophila wing discs. *Biophysical*  
493 *journal* 113(2):491–501.
  - 494 36. Held Jr LI (2005) *Imaginal discs: the genetic and cellular logic of pattern formation.* (Cam-  
495 bridge University Press) Vol. 39.
  - 496 37. Perkins LA, et al. (2015) The transgenic rna project at harvard medical school: resources  
497 and validation. *Genetics* 201(3):843–852.
  - 498 38. Baumbach J, Xu Y, Hehlert P, Kühnlein RP (2014)  $\text{G}\alpha\text{q}$ ,  $\text{g}\gamma 1$  and  $\text{plc}21\text{c}$  control drosophila  
499 body fat storage. *Journal of Genetics and Genomics* 41(5):283–292.
  - 500 39. Werz C, Köhler K, Hafen E, Stocker H (2009) The drosophila sh2b family adaptor Ink acts in  
501 parallel to chico in the insulin signaling pathway. *PLoS genetics* 5(8):e1000596.
  - 502 40. Kakanj P, et al. (2016) Insulin and tor signal in parallel through foxo and s6k to promote  
503 epithelial wound healing. *Nature communications* 7:12972.
  - 504 41. Burnette M, Brito-Robinson T, Li J, Zartman J (2014) An inverse small molecule screen to  
505 design a chemically defined medium supporting long-term growth of drosophila cell lines.  
506 *Molecular BioSystems* 10(10):2713–2723.



# 1 **Supplementary Information for**

## 2 **From spikes to intercellular waves: tuning the strength of calcium stimulation modulates** 3 **organ size control**

4 **Ramezan Paravitorghabeh, Dharsan Soundarrajan, Jeremiah J. Zartman**

5 **Jeremiah J. Zartman.**

6 **E-mail: [jzartman@nd.edu](mailto:jzartman@nd.edu)**

### 7 **This PDF file includes:**

8 Supplementary text

9 Figs. S1 to S23

10 Tables S1 to S2

11 Captions for Movies S1 to S14

12 References for SI reference citations

### 13 **Other supplementary materials for this manuscript include the following:**

14 Movies S1 to S14

15 **Supporting Information Text**

16 **Mathematical model formation**

17 **Outline.** In this supplementary information, we provide a comprehensive hierarchical model of  $\text{Ca}^{2+}$  signaling. Initially, we  
 18 describe the  $\text{Ca}^{2+}$  toolkit model used in the paper at the cellular level. Next, we built a 1D model consisting of a chain of cells  
 19 connected by gap junctions (GJ's). The purpose of the one-dimensional (1D) model is to uncover the collective spatiotemporal  
 20 behavior of  $\text{Ca}^{2+}$  dynamics at the tissue level through the analysis of kymographs. Finally, we built an accurate 2D tissue  
 21 model that explains necessary and sufficient conditions for each of the spatiotemporal classes of  $\text{Ca}^{2+}$  signaling patterns. For  
 22 convenience, most of 2D illustrations of SI figures are associated with supplementary videos in the form of simulation movies.

**Baseline  $\text{Ca}^{2+}$  model.** We adapted a a model describing the dynamics of key components of the  $\text{Ca}^{2+}$  signaling toolkit for individual cells as described in (1). The model consists of four state variables representing the state of components of  $\text{Ca}^{2+}$  signaling.  $c, p, s, r$  denote cytosolic concentration of  $\text{Ca}^{2+}$ ,  $\text{IP}_3$  concentration, concentration of  $\text{Ca}^{2+}$  in Endoplasmic Reticulum (ER) and the fraction of  $\text{IP}_3$  receptors that has not been deactivated by  $\text{Ca}^{2+}$ , respectively. The nominal parameters of the model and their meaning are summarized in Table S1. The dynamics of  $\text{IP}_3$  is given by (1)

$$\begin{aligned} \frac{\partial p}{\partial t} &= D_p \cdot \nabla^2 p + \nu_{\text{PLC}} - \nu_{\text{deg}} \\ &= D_p \cdot \nabla^2 p + \nu_{\text{PLC}} - \nu_{5K} \\ &= D_p \cdot \nabla^2 p + V_{\text{PLC}} \cdot \frac{c^2}{c^2 + K_{\text{PLC}}^2} - k_{5P} p \end{aligned} \quad [1]$$

23 Here,  $D_p$  is the permeability of gap junctions (GJ's) with respect to  $\text{IP}_3$ . Note that the  $\text{IP}_3$  production rate given by the  
 24 parameter  $\nu_{\text{PLC}}$  refers to production of  $\text{IP}_3$  through PLC enzymes (PLC- $\gamma$  or PLC- $\beta$ ). The parameter  $\nu_{\text{PLC}}$  is  $\text{Ca}^{2+}$  dependent,  
 25 and  $\nu_{\text{deg}}$  is the degradation rate.

The dynamics of  $\text{Ca}^{2+}$  concentrations within the cell cytoplasm is given by

$$\begin{aligned} \frac{\partial c}{\partial t} &= D_c \cdot \nabla^2 c + \nu_{\text{rel}} - \nu_{\text{serca}} + \nu_{\text{in}} - \nu_{\text{out}} \\ &= D_c \cdot \nabla^2 c + \underbrace{\left[ k_1 \left( r \cdot \frac{c}{K_a + c} \frac{p}{K_p + p} \right)^3 + k_2 \right] (s - c)}_{\nu_{\text{rel}}} - \underbrace{V_{\text{serca}} \frac{c^2}{c^2 + K_{\text{serca}}^2}}_{\nu_{\text{serca}}} \end{aligned} \quad [2]$$

26 where  $\nu_{\text{rel}}, \nu_{\text{serca}}$  refer to release flux from ER and uptake rate to ER by SERCA ATPase, respectively. In this model, the  
 27 concentration of  $\text{Ca}^{2+}$  inside ER is governed by

$$\frac{ds}{dt} = \frac{1}{\beta} \left( V_{\text{serca}} \frac{c^2}{c^2 + K_{\text{serca}}^2} - \left[ k_1 \left( r \cdot \frac{c}{K_a + c} \frac{p}{K_p + p} \right)^3 + k_2 \right] (s - c) \right), \quad [3]$$

29 where  $\beta$  is the ratio of cytoplasmic volume to ER volume. Finally, the dynamic of  $\text{IP}_3$  inactivation by  $\text{Ca}^{2+}$  is given by

$$\frac{dr}{dt} = \nu_{\text{rec}} - \nu_{\text{inact}} = \frac{1}{\tau_r} \left( 1 - r \frac{K_i + c}{K_i} \right). \quad [4]$$

31 The nominal values of the parameters and their descriptions in this model are described in Table S1. Note that  $V_{\text{PLC}}$  is the  
 32 maximum rate of  $\text{IP}_3$  production by PLC within the cell and depends on the agonist concentration, upstream of PLC activation.  
 33 In this baseline model, increasing  $V_{\text{PLC}}$  increases the frequency of oscillations and decreases the amplitude of  $\text{Ca}^{2+}$  signal.  
 34 Furthermore,  $V_{\text{PLC}}$  serves as a bifurcation parameter. In nonlinear dynamical systems, a bifurcation parameter refers to a  
 35 parameter in the system when its value changes slightly, it can cause an abrupt change in the system behavior.

**Table S1. The parameters and nominal values of the baseline  $\text{Ca}^{2+}$  toolkit model. The parameters are mostly obtained from (1). See Table I in (1) and references there for more details.**

| Parameter          | Description                                                | Values from (1)          |
|--------------------|------------------------------------------------------------|--------------------------|
| $k_{5P}$           | $\text{IP}_3$ dephosphorylation rate                       | $0.66 \text{ s}^{-1}$    |
| $K_{\text{PLC}}$   | Half-activation of PLC                                     | $0.2 \mu\text{M}$        |
| $V_{\text{PLC}}$   | Maximum production rate of $\text{IP}_3$                   | $1.5 \mu\text{M s}^{-1}$ |
| $\beta$            | Ratio of effective volumes ER/cytosol                      | 0.185                    |
| $V_{\text{serca}}$ | Maximum SERCA pump rate                                    | $0.9 \mu\text{M s}^{-1}$ |
| $K_{\text{serca}}$ | Half-activation constant                                   | $0.1 \mu\text{M}$        |
| $c_{\text{tot}}$   | Total $\text{Ca}^{2+}$ concentration in cell               | $2 \mu\text{M}$          |
| $k_1$              | Maximum rate of $\text{Ca}^{2+}$ release                   | $1.1 \text{ s}^{-1}$     |
| $k_2$              | $\text{Ca}^{2+}$ leak                                      | $0.0203 \text{ s}^{-1}$  |
| $K_a$              | $\text{Ca}^{2+}$ binding to activating site                | $0.08 \mu\text{M}$       |
| $K_i$              | $\text{Ca}^{2+}$ binding to inhibiting site                | $0.4 \mu\text{M}$        |
| $K_p$              | $\text{IP}_3$ binding                                      | $0.13 \mu\text{M}$       |
| $\tau_r$           | Characteristic time of $\text{IP}_3$ receptor inactivation | 12.5 s                   |

36 **Single cell model calibration.** For single cell analysis, the diffusion terms are set to be zero. The exact values of the parameters  
 37 described in Table S1 are unknown in the epithelial cells of wing imaginal discs. However, we used these parameters as initial,  
 38 baseline parameters. We subsequently modified differential equation describing  $r$  in Eq. (4) to match the experimental data.  
 39 Two important factors that needed to be calibrated were the duty cycle (the fraction of one period which the signal is active)  
 40 and the frequency of oscillations. Fig. S1 illustrates typical experimental ROI - based  $\text{Ca}^{2+}$  signal of a wing disc, where the  
 41 period is in the order 10 minutes and duty cycle is 40 – 50%.

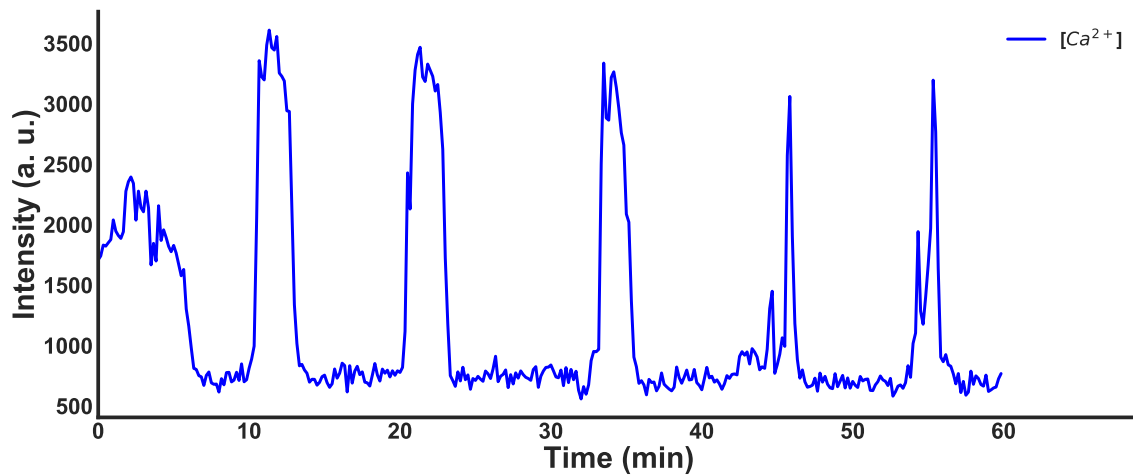

**Fig. S1. Experimental data.** Agonist stimulated (fly extract concentration 15%) generates oscillatory  $\text{Ca}^{2+}$  signals in the wing disc system that have relatively long period (in the order 10 minutes) with variable duty cycles. The region of interest selected is the average intensity of four pixels in an experimental image. The signal is the fluorescence intensity of the genetic encoded calcium sensor (GCaMP6) (2).

42 Therefore, we modified the model by scaling the time constant  $\tau_r$  similar to (3). The new time constant is a function of  
 43 cytosolic  $\text{Ca}^{2+}$  as described below,

$$44 \quad \tau_r(c) \triangleq \tau_{\text{max}} \frac{k_r^4}{k_r^4 + c^4}. \quad [5]$$

45 Therefore, the new dynamics of  $r$  are described by

$$46 \quad \frac{dr}{dt} = \frac{1}{\tau_{\text{max}}} \frac{k_r^4 + c^4}{k_r^4} \left(1 - r \frac{K_i + c}{K_i}\right). \quad [6]$$

Furthermore, we assumed that the total  $\text{Ca}^{2+}$  concentration in a single cell model is fixed (when diffusion is allowed, this assumption is not valid anymore as can be seen in equation 3). For convenience, we summarize equations used for following

single cell analysis below

$$\frac{dc}{dt} = \left[ k_1 \left( r \cdot \frac{c}{K_a + c} \frac{p}{K_p + p} \right)^3 + k_2 \right] (s - c) - V_{\text{serca}} \frac{c^2}{c^2 + K_{\text{serca}}^2} \quad [7]$$

$$\frac{dp}{dt} = V_{\text{PLC}} \cdot \frac{c^2}{c^2 + K_{\text{PLC}}^2} - k_{5\text{PP}} p \quad [8]$$

$$s = \frac{c_{\text{tot}} - c}{\beta} \quad [9]$$

$$\frac{dr}{dt} = \frac{1}{\tau_{\text{max}}} \frac{k_{\tau}^4 + c^4}{k_{\tau}^4} \left( 1 - r \frac{K_i + c}{K_i} \right) \quad [10]$$

47 Nominal values of  $\tau_{\text{max}}$  and  $k_{\tau}$  are summarized in Table S2. Note that as  $k_{\tau} \rightarrow \infty$  or  $c \rightarrow 0$ , the model reduces to the baseline model. However, in the range where  $c \gg 0$ ,  $k_{\tau}$  regulates the  $\text{Ca}^{2+}$  pulse width.

**Table S2. Additional parameters and nominal values of the modified  $\text{Ca}^{2+}$  toolkit model.**

| Parameter           | Description                                                            | Baseline values                     |
|---------------------|------------------------------------------------------------------------|-------------------------------------|
| $D_p$               | GJ permeability for $\text{IP}_3$                                      | $0.005 \mu\text{m}^2 \text{s}^{-1}$ |
| $D_c$               | GJ permeability for $\text{Ca}^{2+}$                                   | $0.05 \mu\text{m}^2 \text{s}^{-1}$  |
| $\tau_{\text{max}}$ | Maximum time constant of $\text{IP}_3$ receptor inactivation           | $1000 \text{s}^{-1}$                |
| $k_{\tau}$          | $\text{Ca}^{2+}$ dependent rate of $\text{IP}_3$ receptor inactivation | $1 \mu\text{M}$                     |

48

49 **Simulation details.** For simulations, we used a step size  $\Delta t = 0.2 \text{s}$ , final simulation time  $T = 3600 \text{s}$  and sampling time for  
 50 obtaining kymographs and animations of  $10 \text{s}$ . The units of  $\text{Ca}^{2+}$  and  $\text{IP}_3$  signals are in  $\mu\text{M}$ . These conditions matched the  
 51 experimental data acquisition rate or were necessary to maintain numerical stability of the simulations.

52 **Properties of the modified model.** As with the baseline model (1),  $V_{\text{PLC}}$  encodes the maximum production of  $\text{IP}_3$  and encodes  
 53 the agonist concentration and is a *Hopf bifurcation* parameter (Fig. S2). Namely, there is a critical threshold on  $V_{\text{PLC}}$  where  
 54 the system stability switches and periodic solutions emerge. Fig. S3 demonstrate the change of behavior of  $\text{Ca}^{2+}$  dynamics  
 55 in response to stimulus ( $V_{\text{PLC}}$ ). If  $V_{\text{PLC}}$  is below a threshold  $V_{\text{PLC}}^* \approx 0.78$ , then there is no oscillations within a window of  
 56 one simulated hour. However, exceeding the  $V_{\text{PLC}}$  above the threshold leads to emergence of periodic  $\text{Ca}^{2+}$  responses. The  
 57 higher values of  $V_{\text{PLC}}$  (i) increases the frequency (equivalently, reduces inter-spike intervals) and (ii) reduces the amplitude of  
 58  $\text{Ca}^{2+}$  oscillations. Hence, the encoding of stimulus into  $\text{Ca}^{2+}$  signals is an amplitude-frequency modulation scheme.

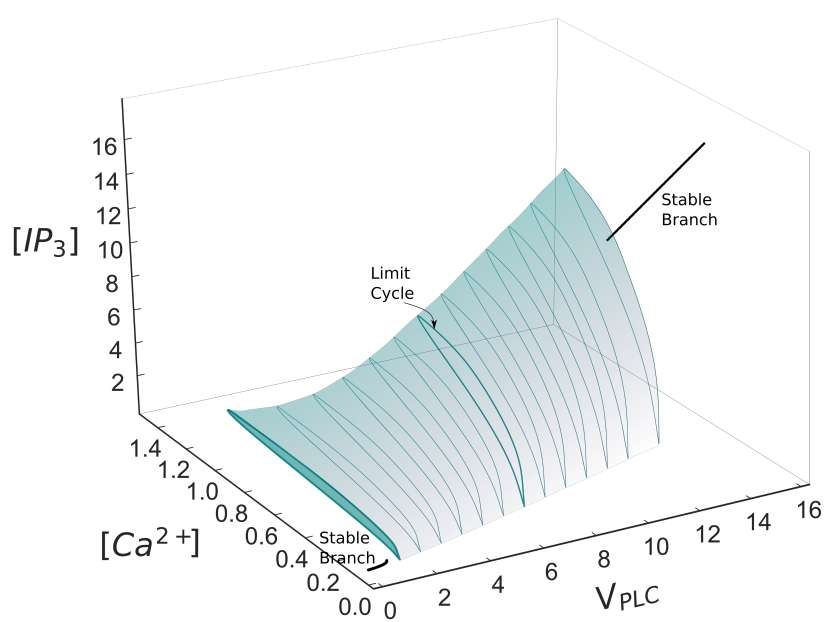

**Fig. S2. Bifurcation and phase plane of  $Ca^{2+}$  and  $IP_3$  oscillations.** Increasing  $V_{PLC}$  from 0 to 15. For  $0.78 \leq V_{PLC} \leq 11.39$ , oscillations arises. The phase plot of  $Ca^{2+}$  and  $IP_3$  are shown in colored surface. The stable branches are outside this interval. Simulation parameters are given in Table S1 and Table S2.

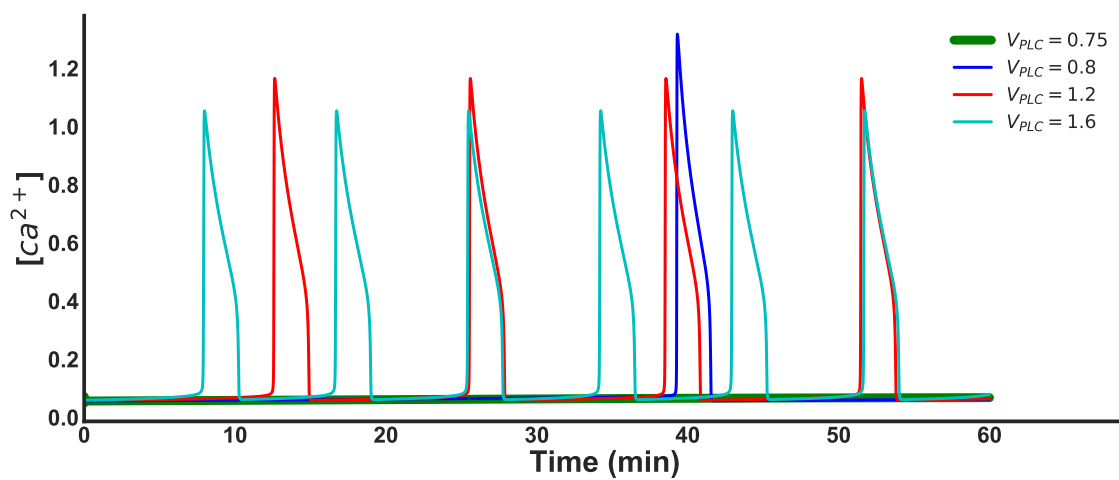

**Fig. S3. Amplitude and frequency of oscillations.** Single cell  $Ca^{2+}$  response in response to stimulus  $V_{PLC}$ . Simulation parameters are given in Table S1 and Table S2.

59 Another important property of  $\text{Ca}^{2+}$  signals are the duty cycle (pulse width). In the proposed model, this quantity is  
60 controlled by  $k_{\tau}$  as depicted in Fig. S4. For fixed amount of  $V_{\text{PLC}} = 1.2$ , the duty cycle increases by increasing  $k_{\tau}$  while the  
amplitude remains approximately fixed and frequency decreases.

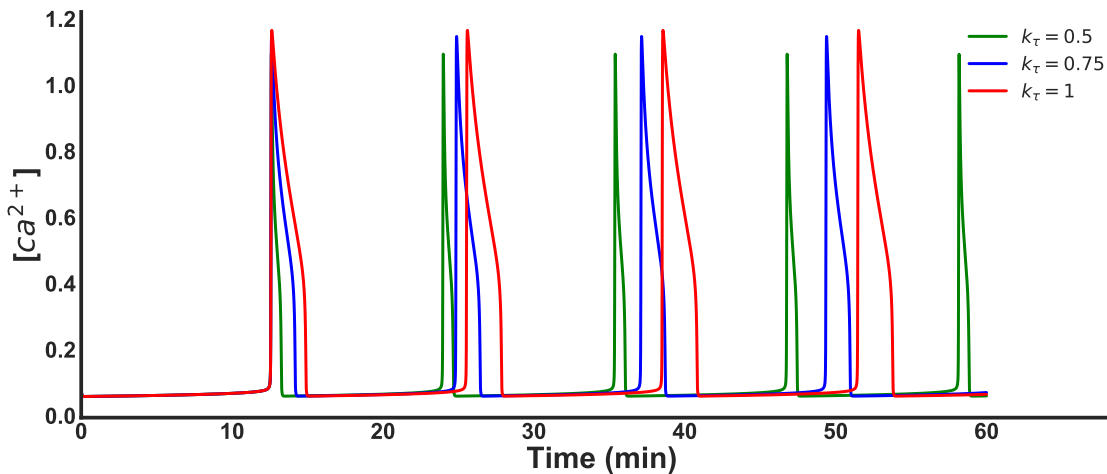

Fig. S4. Duty cycle of oscillations. Increasing  $k_{\tau}$  for fixed stimulus  $V_{\text{PLC}} = 1.2$ , increases duty cycle. The parameters are given in Table S1 and Table S2.

61

## 62 Supplemental Materials and Methods

### 63 Fly stocks

64 A *nub-GAL4*, *UAS-GCaMP6f* reporter tester line was created by recombining *nub-GAL4* and *UAS-GCaMP6f* lines (4). The  
65 final genotype used in all movies is *nub-GAL4*, *UAS-GCaMP6f/CyO*. Additionally, the tester line was crossed to *UAS-mcherry*  
66 to develop another tester line that was used for some imaging experiments. The following UAS-transgene lines were obtained  
67 from BDRC: *UAS-RyR<sup>RNAi</sup>* (BL#31540), *UAS-InsR<sup>CA</sup>* (BL#8248), *UAS-InsR<sup>DN</sup>* (BL#8252), *UAS-Gq* (BL#30734). Progeny  
68 wing phenotypes are from F1 male progeny emerging from either *nub-Gal4*, *UAS-GCaMP6f/CyO* x *UAS-X* cross or *nub-Gal4*,  
69 *UAS-GCaMP6f/CyO*; *UAS-mcherry* x *UAS-X* cross. Adult wings were measured using ImageJ and the wing boundaries  
70 following vein L1 and L5 respectively. All the flies were raised at 25C and 12-hour light cycle.

### 71 Live imaging

72 Wandering third instar larva approximately 6 days after egg laying was dissected and wing discs were obtained. Wing discs  
73 were dissected in ZB media with 15 % fly extract (5). ZB media + 15 % fly extract contains 79.4% (v/v) ZB media, 0.6% (v/v)  
74 of 1 mg/ml of insulin (Sigma aldrich), 15% ZB-based fly extract and 5% penicillin/streptomycin (Gibco). Wing discs were  
75 loaded into previously described REM-Chip (6) and imaged using Nikon Eclipse Ti confocal microscope with a Yokogawa  
76 spinning disc and MicroPoint laser ablation system. Image data were collected on an IXonEM+colled CCD camera (Andor  
77 technology, South Windsor, CT) using MetaMorph v7.7.9 software (Molecular devices, Sunnyvale, CA). Discs were imaged at  
78 three z-planes with a step size of 10  $\mu\text{m}$ , 20x magnification air objective with 10-second intervals for a total period of one hour,  
79 with 200 ms exposure time, and 50 nW, 488 nm laser exposure at 44 % laser intensity. We blocked gap junction by inhibiting  
80 innexin-2 using Carbenoxolone (Cbx) drug (4). Wing discs were incubated in ZB + 15% FEX with 30  $\mu\text{M}$  Cbx for one hour  
81 before imaging. Cbx was obtained from Sigma aldrich. To induce  $\text{Ca}^{2+}$  transients, we imaged wing discs in ZB media + 2.5 %  
82 FEX.  $\text{Ca}^{2+}$  waves were induced by imaging the wing disc in ZB media + 15 % FEX and  $\text{Ca}^{2+}$  fluttering was observed when  
83 discs were imaged in ZB media + 40 % FEX respectively.

### 84 1D model of intercellular $\text{Ca}^{2+}$ signaling

85 We consider a simple chain of cells connected by gap junctions (GJ's) as a basic form of intercellular  $\text{Ca}^{2+}$  signaling. The  
86 purpose of this model is to understand the underlying mechanisms for the formation of spikes, transients and waves. We can  
87 think of different forms of  $\text{Ca}^{2+}$  dynamics as local, short range and long range communication. Therefore, the model provides  
88 insight on the role of bifurcation phenomenon in cellular communication. We used kymographs to investigate spatiotemporal  
89 dynamics under different scenarios as described below.

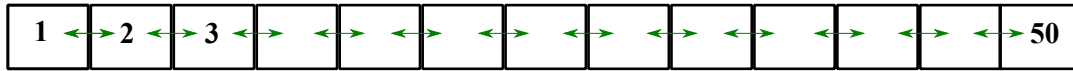

**Fig. S5. Simplified 1D Model.** The model consists of 50 cell connected by gap junctions. For simplicity, we assume cells are homogeneous, namely with same parameters as described in Table S1 and Table S2. The green arrows show the direction of gap junction communication. The amount of stimulus applied to cell  $i$  is denoted by  $V_{PLC}[i]$ , for  $1 \leq i \leq 50$ .

90 **Permeability of GJ's affect wave speed.** It is known that diffusion of second messengers allow for intercellular communication.  
 91 Within the context of  $Ca^{2+}$  signaling, diffusion of the  $IP_3$  is known to be responsible for propagating communication of  
 92  $Ca^{2+}$  signal dynamics across tissues . It is assumed that due to buffering of  $Ca^{2+}$ ,  $D_p \gg D_c$ . In Fig. S6, we incrementally  
 93 increase the permeability of GJ's to analyze the effect of  $D_p$ . For these simulations, we assume only the first cell is stimulated.  
 94 When there is no GJ communication, there is no propagation. Increasing  $D_p$  causes wave propagation and the speed of waves  
 95 is proportional to  $D_p$ .

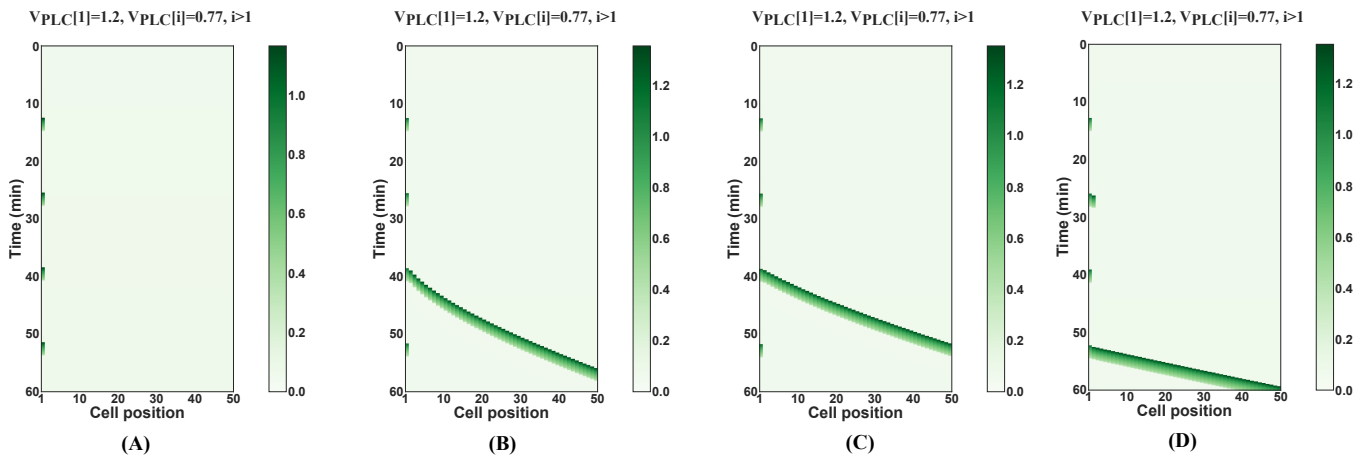

**Fig. S6. Effect of GJ permeability.** For all panels, the left most cell is stimulated and the rest of the cells are not. The gap junction permeability is varied as follows: (A)  $D_p = 0$ ,  $D_c = 0$  (no GJ communication), (B)  $D_p = 0.003$ ,  $D_c = 0.0005$ , (C)  $D_p = 0.0005$ ,  $D_c = 0.0005$ , (D)  $D_p = 0.010$ ,  $D_c = 0.0005$ . As it can be seen from the kymographs, the speed of wave propagation increases with increasing  $D_p$ . Initial conditions are  $c_i = 1$ ,  $p_i = 1$ ,  $r_i = .5$  for  $1 \leq i \leq 50$ .

96 **Waves with limited range.** Intercellular  $Ca^{2+}$  transients (ICT's) are a form of dynamics where the range of  $Ca^{2+}$  signaling is  
 97 limited to a couple of cells. Here, we investigate possibilities for such dynamics. One way to get limited range, is to reduce  
 98  $V_{PLC}$ . In Fig. S7, this effect is depicted by reducing the amount of  $V_{PLC}$  in cells (A) 10 and (B) 30, respectively. The range  
 99 of wave propagation is limited to where the reduction in  $V_{PLC}$  happens. **Equivalently, when a collection of cells are**  
 100 **stimulated with roughly equal strength near a Hopf bifurcation, wave propagation is facilitated.**



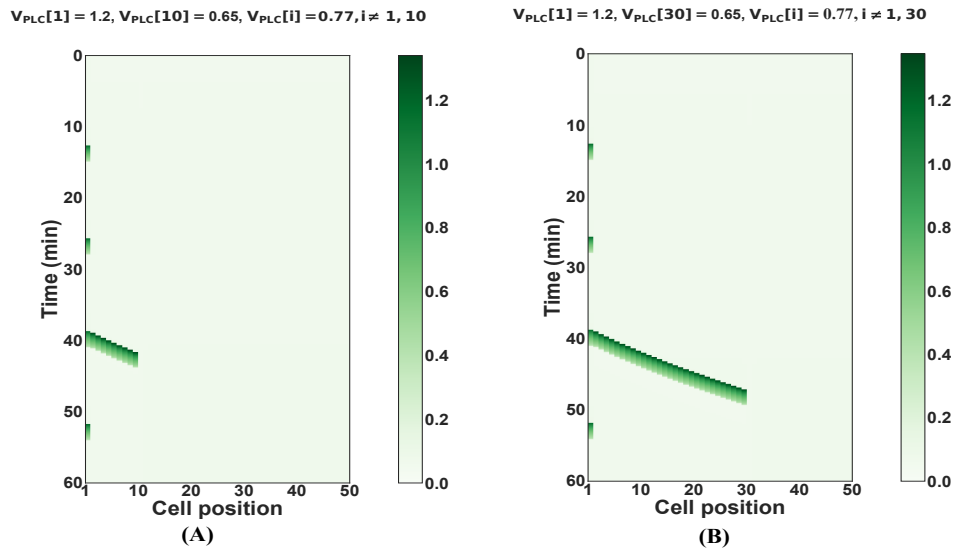

**Fig. S7. Waves with limited range (effect of  $V_{PLC}$ ).** For both panels, the left most cell is stimulated and the rest of the cells are not. (A)  $V_{PLC}[10]$  is reduced to 0.65 (B)  $V_{PLC}[30]$  is reduced to 0.65. The other parameters are the same as described in Table S1 and Table S2.

101 While reducing the  $V_{PLC}$  weakens the positive feedback term in the  $IP_3$  differential equations, similar effect occurs if  
 102 degradation rate  $k_{5P}$  of  $IP_3$  is increased. In Fig. S8, this effect is depicted by increasing the amount of  $k_{5P}$  in cells (A) 10  
 103 and (B) 30, respectively. Shown in Fig. S8, the range of wave propagation is going to be limited to where the increase in  $k_{5P}$   
 104 happens.

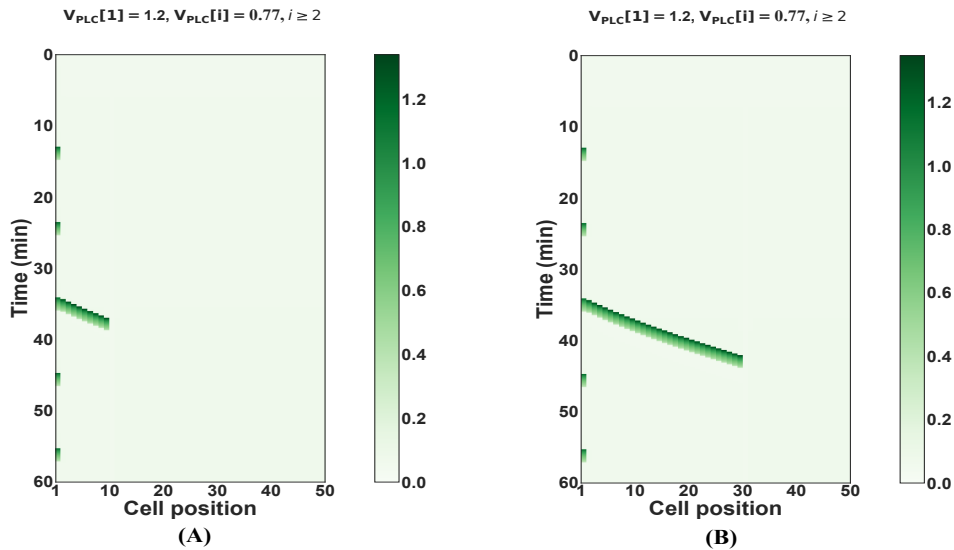

**Fig. S8. Waves with limited range (effect of  $k_{5P}$ ).** For both panels, the left most cell is stimulated and the rest of the cells are not. (A)  $k_{5P}$  at cell 10 is increased to 1.5 (B)  $k_{5P}$  at cell 30 is increased to 1.5. The other parameters are the same as described in Table S1 and Table S2.

105 The simulations above demonstrate the important role of  $IP_3$  in wave propagation in this model. Specifically, variations in  
 106  $V_{PLC}$  and  $k_{5P}$  have an impact on wave patterning (namely, initiation sites and formation of preferential waves).

107 **Effect of pulse width.** The pulse widths of  $Ca^{2+}$  signals can be varied by changing  $k_r$ . As it can be seen in Fig. S9, longer pulse  
 108 widths cause more overlap between signals in consecutive cells.

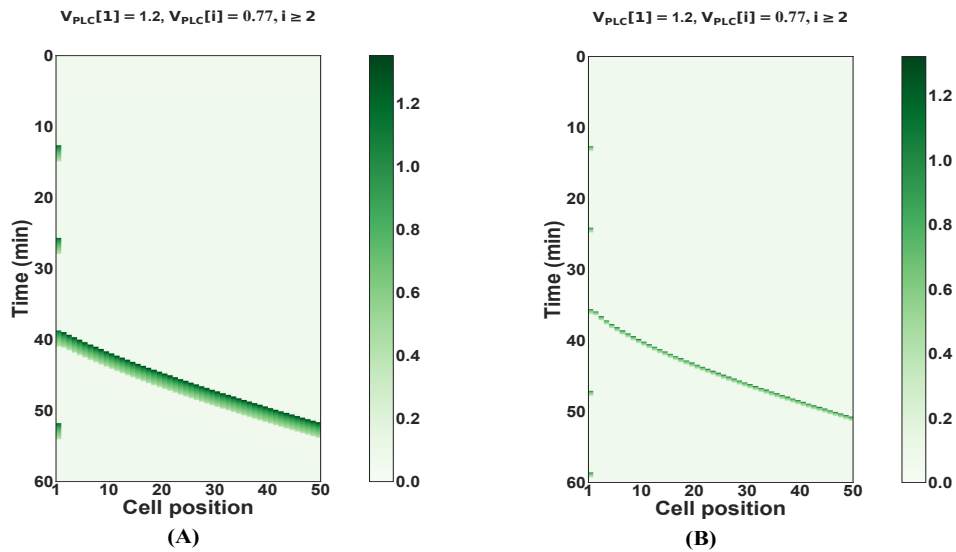

**Fig. S9. Effect of pulse width.** For all panels, the left most cell is stimulated, and the rest of the cells are not. All cells have (A)  $k_\tau = 1$  (B)  $k_\tau = .5$ . The other parameters are the same as described in Table S1 and Table S2.

109 **Effect of  $V_{PLC}$  gradient.** The presence of a gradient in  $V_{PLC}$  cause variable speeds in wave propagation. As it can be seen in  
 110 Fig. S10 (A) and (B), in both cases, cells with higher  $V_{PLC}$  (left most cells) experience faster  $Ca^{2+}$  waves.

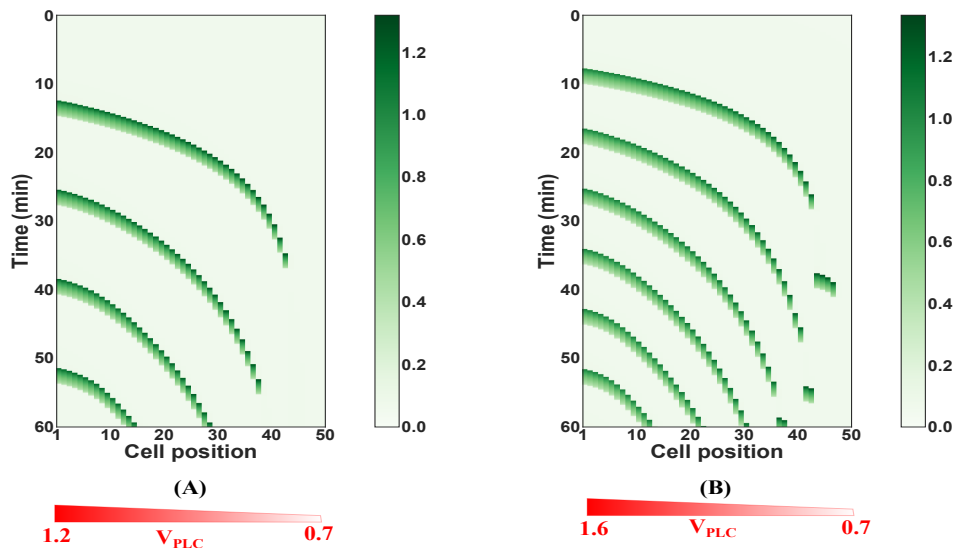

**Fig. S10. Effect of  $V_{PLC}$  gradient.** For all panels, the left most cell is stimulated, and the rest of the cells are not. The value of  $V_{PLC}$  have been changed in cells (A) from 1.2 to 0.7, (B) from 1.7 to 0.7. The other parameters are the same as described in Table S1 and Table S2.

111 **What triggers wave propagation?** So far, we have considered wave propagation in a deterministic regime, in the sense that the  
 112 effect of heterogeneity and initial conditions were ignored. Is the diffusion of  $IP_3$  the sole reason for triggering waves? Here, we  
 113 show that the answer to this question is **negative**. We show that the necessary conditions for triggering waves are (i) **energy**  
 114 **content in the diffusive  $IP_3$  pulse**, (ii) **the fraction of inactive  $IP_3$  receptors must be above a threshold**.

115 To prove above claims, we performed a series of simulations using the single cell model which reveal the reason behind  
 116 wave propagation. We modeled external diffusive  $IP_3$  as a square pulse  $u_p(t)$  with limited duration, thus the  $IP_3$  dynamics was  
 117 modified as follows:

$$118 \quad \frac{dp}{dt} = u_p(t) + \nu_{PLC} - \nu_{deg}. \quad [11]$$

119 Fig. S11 shows the effect that diffusive  $IP_3$  pulse can cause  $Ca^{2+}$  pulses to occur. Fig. S11A shows the lack of dynamics  
 120 when no external  $IP_3$  diffused. In Fig. S11B-D, the same diffusive pulse is applied at different times denoted by  $t_0$ . In (B),

121 there is no  $\text{Ca}^{2+}$  response, while in (C) and (D) the  $\text{Ca}^{2+}$  response is triggered. The reason for this is that the activation of  
 122 positive feedback loop in equation (2) depends on the value of  $r$  and  $p$ . When  $r, p$  are large enough, then the positive feedback  
 123 loop gets activated.

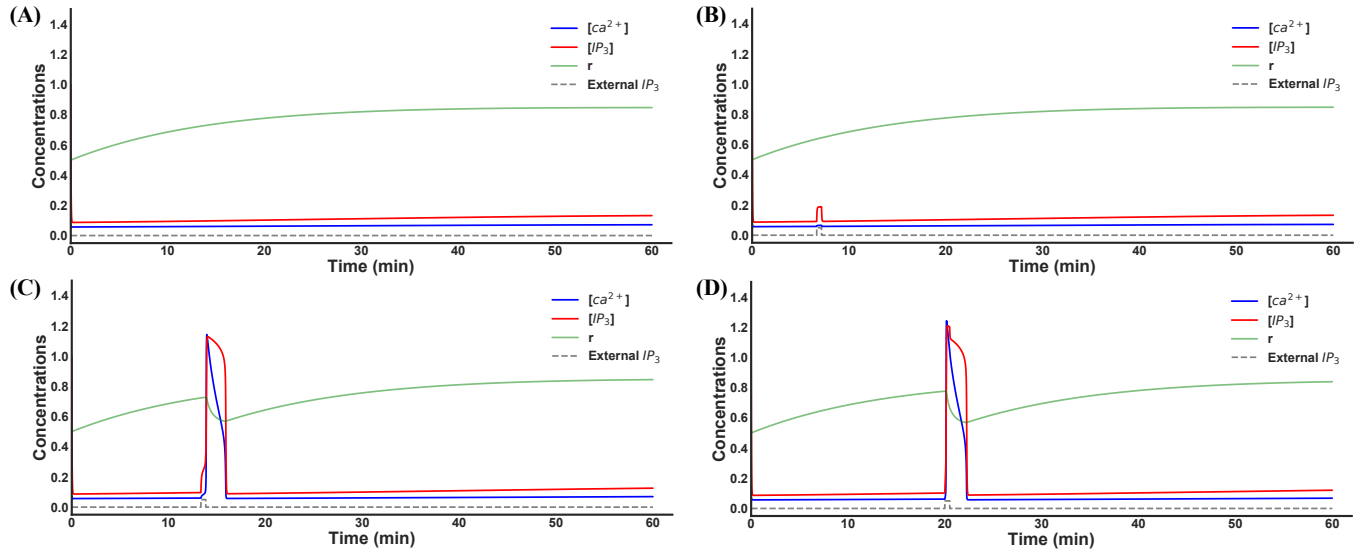

**Fig. S11. Triggering mechanism by applying external diffusive  $\text{IP}_3$ .** Single cell response by applying diffusive  $\text{IP}_3$  pulse. For this simulation,  $V_{\text{PLC}} = 0.77$  and other parameters are the same as described in Table S1. (A) no external  $\text{IP}_3$ , (B) an external  $\text{IP}_3$  pulse with duration 30s and amplitude 0.05 applied at  $t_0 = 6$  minutes, (C) an external  $\text{IP}_3$  pulse with duration 30s and amplitude 0.05 applied at  $t_0 = 12$  minutes, (D) an external  $\text{IP}_3$  pulse with duration 30s and amplitude 0.05 applied at  $t_0 = 20$  minutes. While for (B), (C) and (D) the pulse has the same strength, only in (C) and (D)  $\text{Ca}^{2+}$  response is induced. This suggests that the fraction of inactivated  $\text{IP}_3$  receptors  $r$ , must be above a threshold to trigger  $\text{Ca}^{2+}$  response.

124 The other important factor is the energy of diffusive pulse defined as  $\int u_p^2(t) dt$ . Fig. S12 illustrate this fact by applying  
 125 diffusive  $\text{IP}_3$  pulses with different energy levels applied at the same time.

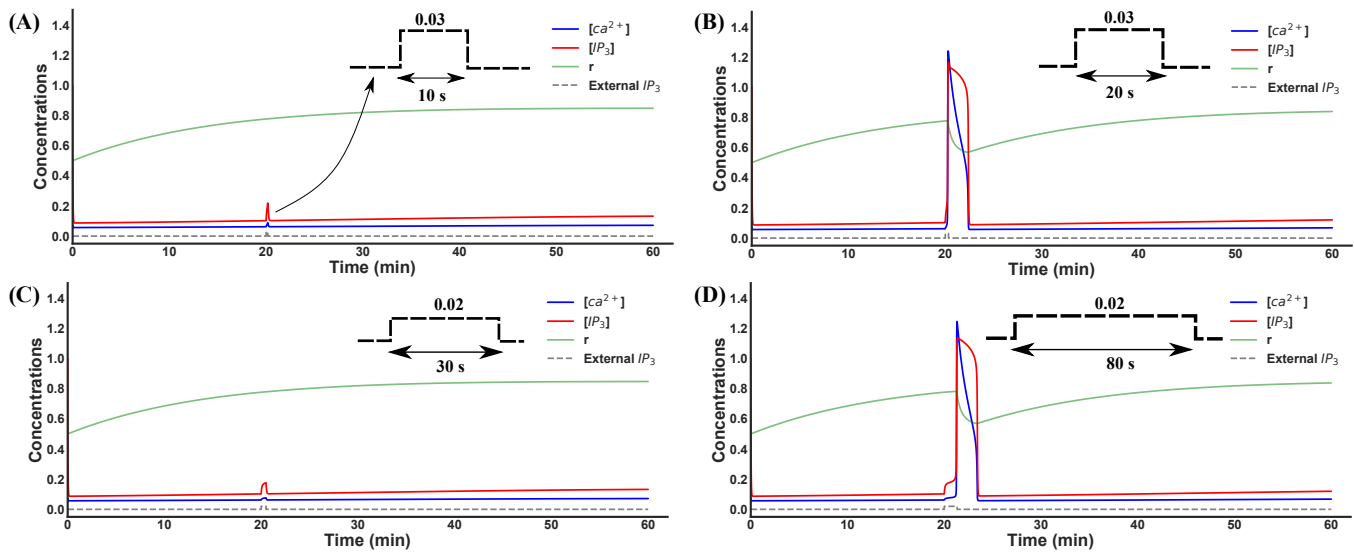

**Fig. S12. Energy of external diffusive  $IP_3$ .** Single cell response by applying diffusive  $IP_3$  pulse. For this simulation,  $V_{PLC} = 0.77$  and other parameters are the same as described in Table S1. All diffusive  $IP_3$  pulses applied at the same time (at 20 minutes) and the shape of pulse is magnified in all panels. (A) no  $Ca^{2+}$  response due to weak pulse, (B)  $Ca^{2+}$  response is observed by increasing pulse width, (C) no  $Ca^{2+}$  response (while the area under curve compared to (C) is fixed), (D) longer pulse width compared to (C) cause  $Ca^{2+}$  response. This suggests that the strength of diffusive depends on the overall energy of diffusive  $IP_3$  pulse.

126 The above analysis has following important consequences when studying tissue  $Ca^{2+}$  signaling: We can treat the diffusive  
 127  $IP_3$  signal  $u_p(t)$  in the above analysis as the diffusion of  $IP_3$  that comes from neighboring cells through GJ's. **Therefore, for**  
 128  **$Ca^{2+}$  response to occur in a cell due to diffusion of  $IP_3$ , not only strength of diffusion matters, but also the**  
 129 **state of the cell matters.** Here, the state of the cell refers to  $r$ , the fraction of inactivated  $IP_3$  receptors. Of course, the  
 130 permeability of GJ's also affects the strength of diffusion. We elaborate these in the 1D model in the following examples.

131 Fig. S13 shows an extreme example, the effect of initial value of  $r$ . All the cells have the same initial conditions and  
 132 parameters, except the first cell, which is stimulated. We see the effect of change in initial value of  $r$  for cell 25. Depending on  
 133 the cellular state (defined by variable  $r$  here), wave propagation can be stopped or inhibited.

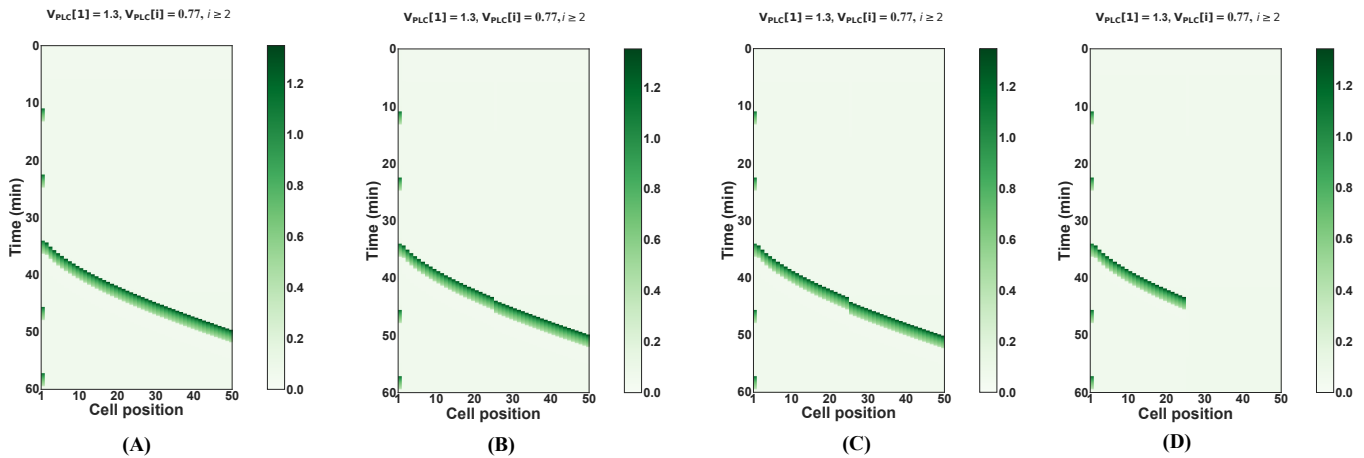

**Fig. S13. State of the cells affect wave propagation.** For all panels, the left most cell is stimulated and the rest of the cells are not. Initial conditions for  $r$  at cell 25 are chosen as (A) 0.5, (B) 0.2, (C) 0.15, (D) 0.1. The other parameters are the same as described in Table S1 and Table S2. In (A), the wave propagates. As it can be seen in (B), (C) and (D), the state of the cell can modify or even inhibit wave propagation. While there is small delay at panels (B) and (C), the wave completely stops in (D).

## 134 Formulation of the full 2D tissue-scale model

135 **Building the model.** We used experimental images of a wing pouch to model the tissue structure. Figure S14 (a) demonstrates  
 136 the original image of the epithelia and is overlaid by an elliptical curve representing a region of interest (ROI). We used Icy  
 137 software and Epitools extension (7, 8) to segment the boundaries of the cells within the tissue restricted to the chosen ROI.  
 138 The segmentation result is depicted in Figure S14 (b), which encodes information about the tissue structure. The selected ROI  
 139 in the wing pouch consists of roughly 3225 cells within the ROI.

140 To create a smooth shape for the outer boundaries, we used the convex hull restricted to centroids of the cells. Then, Lloyd's  
141 algorithm (9) with four rounds of iterations was used to smoothen the shape of cells. The average number of cell neighbors is 6,  
142 which is consistent with literature (see *e.g.* (10)). In terms of diffusion analysis, the length of edges between cells is used as a  
143 factor for modeling the strength of chemical communication through the gap junctions. A basic assumption of the model is  
144 that gap junctions are homogeneously distributed along the lengths of cell membranes. Fig. S15 shows the final result for the  
145 geometry of the tissue.

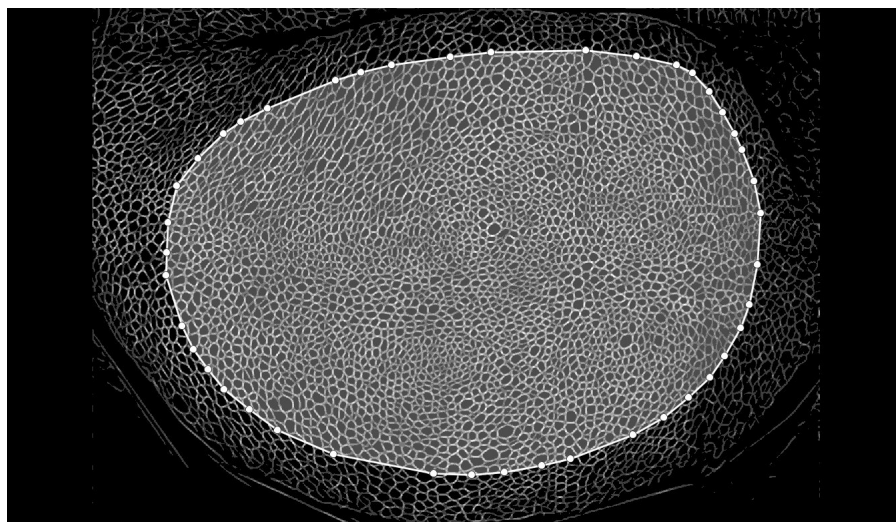

(a)

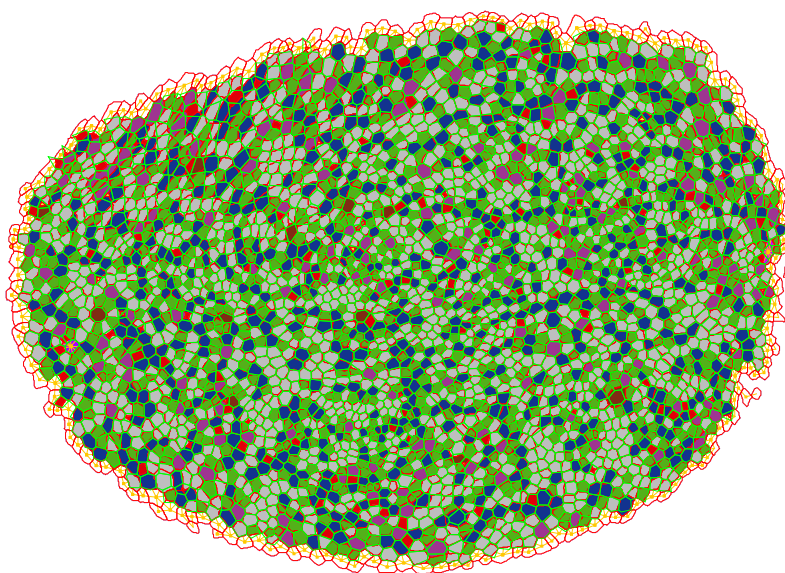

(b)

**Fig. S14.** (a) The original image of wing pouch and an elliptical region of interest, which is used to segment cell shapes and boundaries. (b) The result of using Epitools for segmentation. The original cell areas are colored based on the number of neighbors. The green edges show result of Voronoi tessellation algorithm applied to centroids of the cells. Cells in the boundary of the tissue are transparent. In the simulations, for those boundary cells, we assume there is no flux along cell membranes that are not shared with other cells.

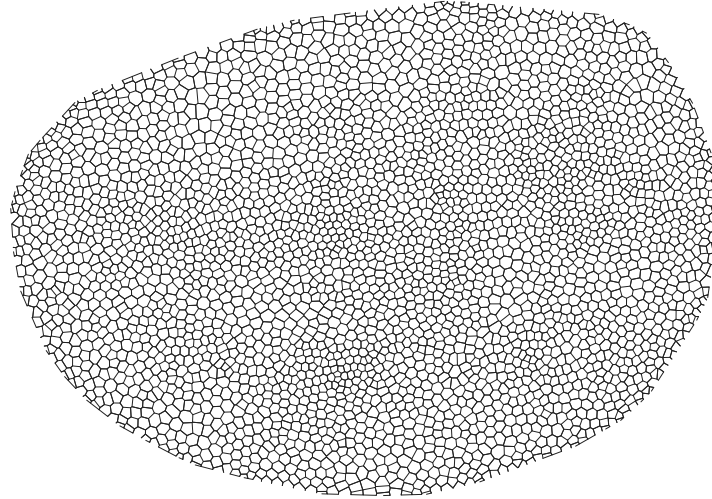

**Fig. S15. Geometry of the tissue.** The final geometric structure of the tissue used for simulating  $\text{Ca}^{2+}$  signaling. The tissue consists of 3225 cells.

146 **2D simulation details.** To simulate  $\text{Ca}^{2+}$  dynamics at the tissue level, we solved  $3225 \times 4 = 12900$  ordinary differential equations  
147 (ODE). We assumed individual cells are spatially homogeneous. However, when solving for tissue scale, in addition to a system  
148 of ODE's, the diffusion terms are also considered. The diffusive flux of the species such as  $\text{IP}_3$  or  $\text{Ca}^{2+}$  is computed as the  
149 weighted difference between a cell and its neighbors. The weights are chosen to be proportional to the length of the edge shared  
150 between two neighbors. The permeability coefficient  $D_p$  or  $D_c$  is based on the parameters given in Table S1. More precisely, if  
151 the set of the neighbors of cell  $i$  is denoted by  $\mathcal{N}(i)$ , then the flux corresponding to diffusion term for  $\text{IP}_3$  (p) is approximated by

$$152 \quad \text{Flux} \approx D_p \left[ \sum_{j \in \mathcal{N}_i} p_j l_j - p_i \left( \sum_{j \in \mathcal{N}_i} l_j \right) \right] \quad [12]$$

153 where  $l_j$  is the length of the shared edge between cells  $i$  and  $j$ . Similar rule applies to diffusive  $\text{Ca}^{2+}$ .

154  **$\text{Ca}^{2+}$  spikes when GJ's are blocked.** There is no synchronization between cells and individual cell  $\text{Ca}^{2+}$  levels oscillate indepen-  
155 dent from each other when the GJ's are blocked. Movie S1 corresponds to the experimental data in this situation:

156 **Movie S1.** The experimental data of  $\text{Ca}^{2+}$  dynamics when the gap junctions are blocked. Wing discs incubated  
157 in ZB media with 15 (v/v) % fly extract and 30  $\mu\text{M}$  of Carbonxolene shows uncoordinated  $\text{Ca}^{2+}$  spikes.

158 **Movie S2.** The simulation results of  $\text{Ca}^{2+}$  dynamics when the gap junctions are blocked. Here, we set  
159  $D_p = D_c = 0$ . There is no synchronization of  $\text{Ca}^{2+}$  signals between cells in the tissue.

160  **$\text{Ca}^{2+}$  local spikes when GJ's are not blocked.** In experimental data, there are local  $\text{Ca}^{2+}$  spikes despite the presence of GJ  
161 communication. Movie S3 corresponds to the experimental data in this situation. Movie S4 depicts the simulation result,  
162 which exhibits local spikes. Figure S16 shows the stimulation profile (values of  $V_{\text{PLC}}$  for individual cells). This simulation  
163 suggests that local spikes occur when most of the cell have low  $V_{\text{PLC}}$ , except for a few cells which have higher levels  $V_{\text{PLC}}$ . In  
164 this case, the spikes occur at those cells despite GJ diffusion. The low amount of  $V_{\text{PLC}}$  in neighboring cells inhibits propagation  
165 of  $\text{Ca}^{2+}$  waves.

166 **Movie S3.** Experimental data for local  $\text{Ca}^{2+}$  spikes. Third instar wings dissected 7 days after egg laying and  
167 dissected in ZB media with 15 (v/v)% fly extract inhibit localized  $\text{Ca}^{2+}$  spikes

168 **Movie S4.** The simulation results of  $\text{Ca}^{2+}$  local spikes when gap junction-based communication is present.

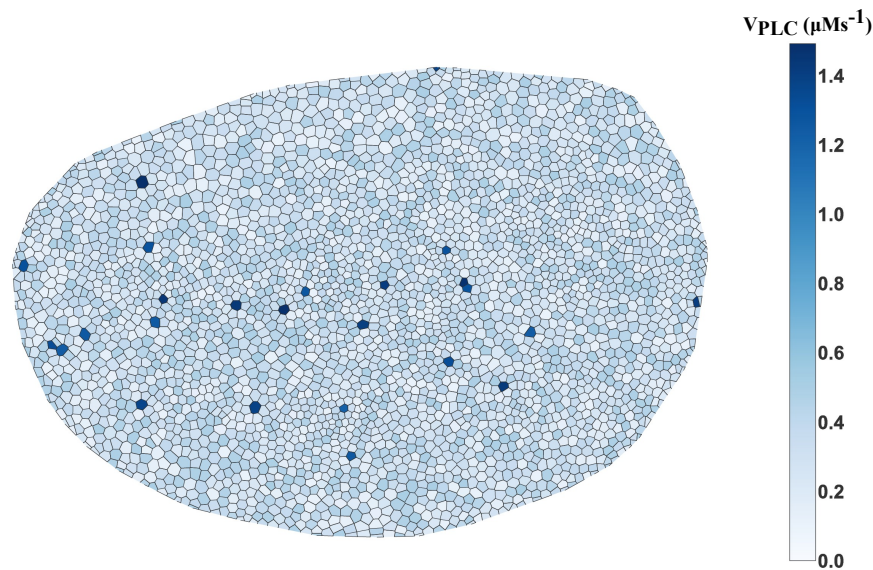

**Fig. S16. Stimulation profile for local  $\text{Ca}^{2+}$  spikes corresponding to Movie S4.** This figure illustrates the color map of  $V_{\text{PLC}}$  throughout the tissue. We assumed  $V_{\text{PLC}}$  remains fixed throughout simulation interval. Local spikes occur at vicinity of individual cells with high values of stimulation.

169  **$\text{Ca}^{2+}$  transients.** In experimental data, we observed a class of  $\text{Ca}^{2+}$  dynamics that resemble waves, but with a very limited  
170 propagation range. Movie S5 corresponds to the experimental data in this situation. Movie S6 depicts the simulation result to  
171 have transients. Fig. S17 depict the stimulation profile of the cells in this simulation.

172 **Movie S5. Experimental data for  $\text{Ca}^{2+}$  transients. Third instar wing discs dissected 6 days after egg laying  
173 and incubated in ZB media with 15 (v/v) % fly extract results in  $\text{Ca}^{2+}$  transients.**

174 **Movie S6. The simulation results of  $\text{Ca}^{2+}$  transients associated with  $V_{\text{PLC}}$  distribution in Fig. S17.**

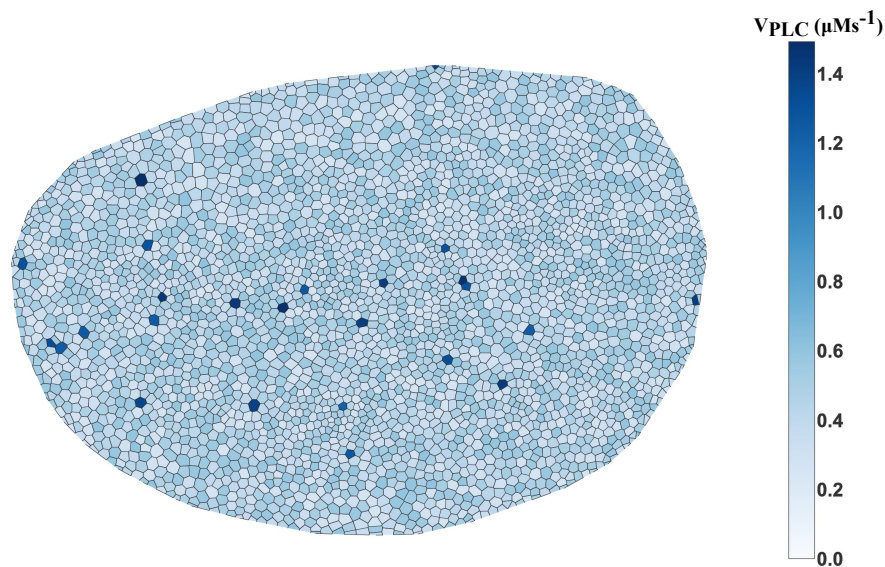

**Fig. S17. Stimulation profile for local  $\text{Ca}^{2+}$  spikes corresponding to Movie S6.** This figure illustrates the color map of  $V_{\text{PLC}}$  throughout the tissue. We assumed  $V_{\text{PLC}}$  remains fixed throughout simulation interval.

175  **$\text{Ca}^{2+}$  waves.** The 1D model suggests that the diffusion of  $\text{IP}_3$  with enough strength can trigger waves spreading throughout the  
176 tissue. In this section, we provide the simulation results regarding different wave patterns. We emphasize that the results are  
177 based on simplified model of  $\text{Ca}^{2+}$ . There are multiple factors such as heterogeneity in the set of parameters that were not  
178 considered in this study for simplicity.



179 The first class of waves occur when the cells are at rest near the Hopf bifurcation and a stimulus is applied to a single cell.  
180 This creates a wave which travels throughout the tissue. This scenario is illustrated in Movie S7 and Fig. S18.  
181 **Movie S7. The simulation results of stimulating a single cell and obtaining  $\text{Ca}^{2+}$  waves.**

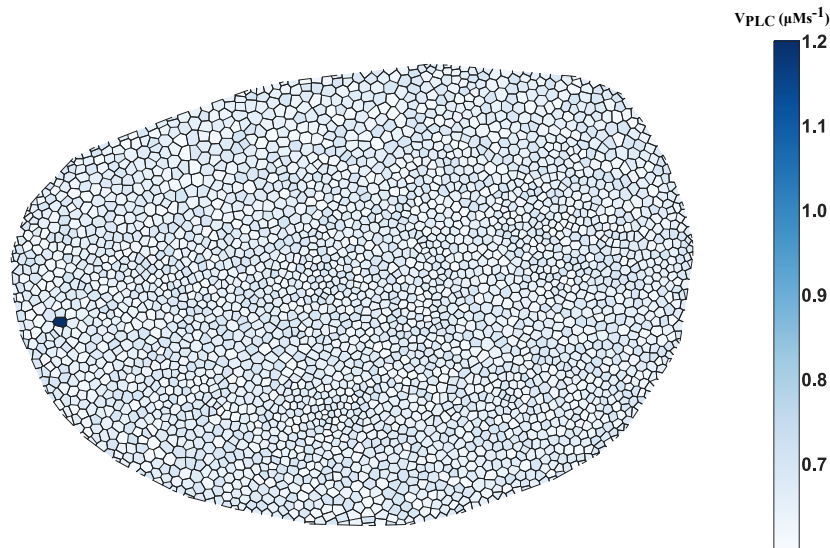

**Fig. S18. Stimulation profile for  $\text{Ca}^{2+}$  wave corresponding to Movie S7.** This figure illustrates the color map of  $V_{\text{PLC}}$  throughout the tissue. We assumed  $V_{\text{PLC}}$  remains fixed throughout simulation interval. A single cell is stimulated by setting high value for its  $V_{\text{PLC}} = 1.2$ . The rest of cells have random uniform  $V_{\text{PLC}} \in [0.6, 0.7]$  which is below the bifurcation threshold.

182 Next we considered the case where the  $V_{\text{PLC}}$  profile is mostly closed to the Hopf bifurcation, except a tiny fraction of cells,  
183 which are initiation sites and have higher  $V_{\text{PLC}}$ . This scenario is illustrated in Movie S8 and Fig. S19.  
184 **Movie S8. The simulation results of randomly stimulating cells and obtaining  $\text{Ca}^{2+}$  waves.**

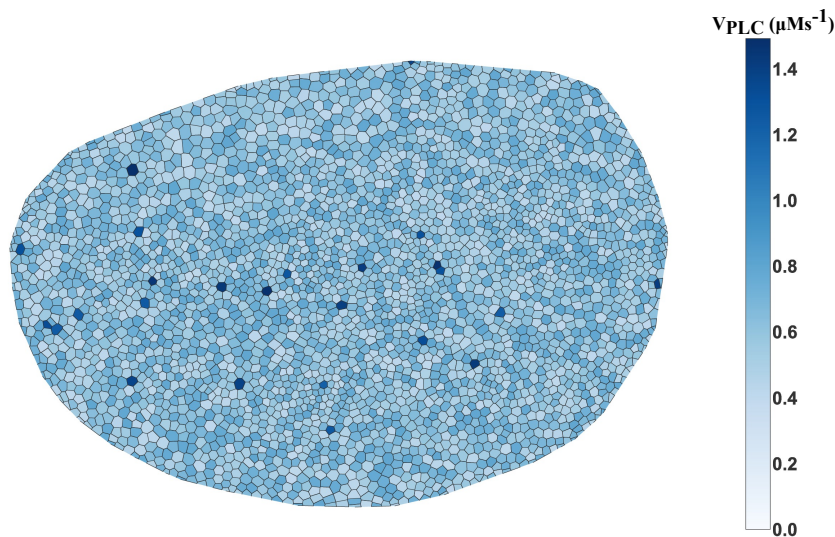

**Fig. S19. Stimulation profile for  $\text{Ca}^{2+}$  wave corresponding to Movie S8.** This figure illustrates the color map of  $V_{\text{PLC}}$  throughout the tissue. We assumed  $V_{\text{PLC}}$  remains fixed throughout simulation interval.

185 **Preferential  $\text{Ca}^{2+}$  waves.** Preferential waves are the waves which travel in a specific direction. The simulation results suggests  
186 that reducing  $V_{\text{PLC}}$  or increasing  $\text{IP}_3$  degradation rate within specific regions in the disc inhibits waves to pass those regions.  
187 This effect, in return, causes the formation of waves which prefer specific directions. For instance, the experimental data as in  
188 Movie S9 demonstrate an instance of radial pattern in  $\text{Ca}^{2+}$  wave in the imaginal wing disc. By choosing  $V_{\text{PLC}}$  as depicted in  
189 Fig. S20, we see preferential waves.

190 Another example is depicted in Movie S11 where cells in stripe along the anterior/posterior (A/P) and dorsal/ventral (D/V)  
191 have smaller values of  $V_{PLC}$  as in Fig. S21. The waves in this scenario tend to annihilate along A/P and D/V axes.  
192 **Movie S9. Experimental data for radial  $Ca^{2+}$  pattern.**  
193 **Movie S10. The simulation results of radial  $Ca^{2+}$  pattern.**

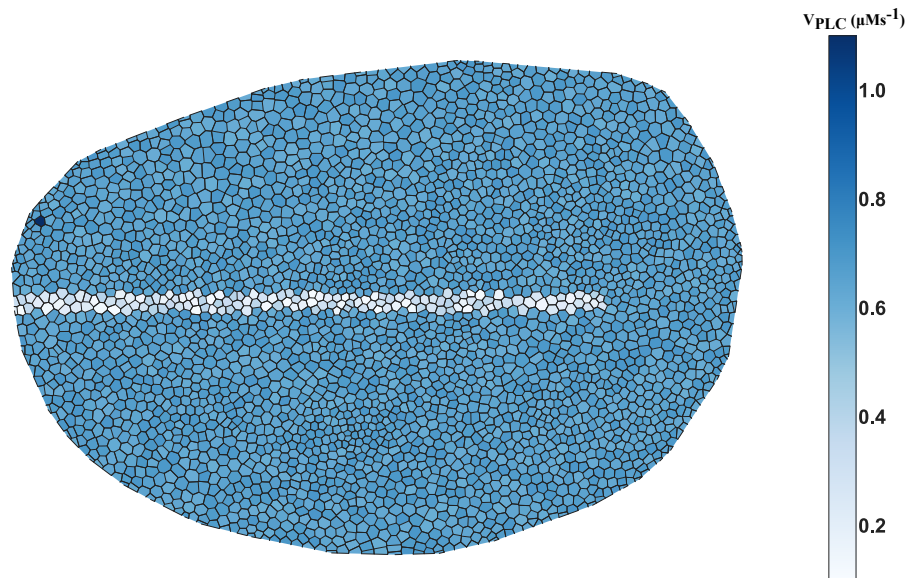

**Fig. S20. Stimulation profile for  $Ca^{2+}$  wave radial pattern corresponding to Movie S10.** This figure illustrates the color map of  $V_{PLC}$  throughout the tissue. We assumed  $V_{PLC}$  remains fixed throughout simulation interval. A single cell is stimulated by setting high value for its  $V_{PLC} = 1.1$ . A stripe of cells along A/P axis is chosen to have very low  $V_{PLC}$ . The rest of cells have random uniform  $V_{PLC} \in [0.6, 0.7]$  which is below the bifurcation threshold.

194 **Movie S11. The simulation results of preferential  $Ca^{2+}$  waves with random stimulation.**

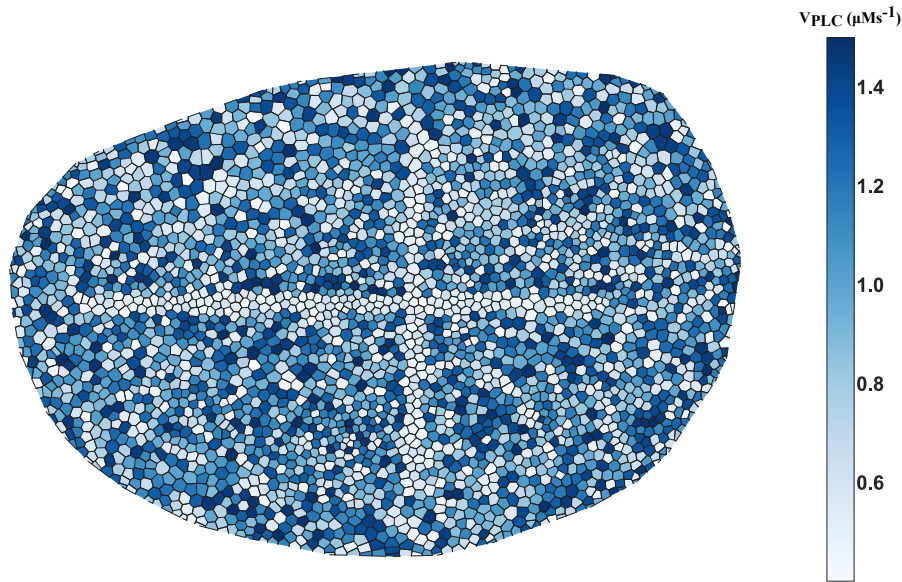

**Fig. S21. Stimulation profile for Ca<sup>2+</sup> preferential pattern corresponding to Movie S11.** This figure illustrates the color map of  $V_{PLC}$  throughout the tissue. We assumed  $V_{PLC}$  remains fixed throughout simulation interval. A stripe of cells along A/P and D/V axis is chosen to have relatively low  $V_{PLC}$ . The rest of cells have random uniform  $V_{PLC} \in [0.3, 1.2]$ .

195 **Fluttering pattern.** The final class of experimental Ca<sup>2+</sup> dynamics is the fluttering pattern where the whole disc is in an active  
196 signaling state. Movie S12 and Movie S13 correspond to experimental and simulation results. In simulations, all cells have  
197 been chosen to have high  $V_{PLC}$ . However, the other important factor which causes fluttering to occur is higher values of  $K_{serca}$ .  
198 Fig. S23 depicts a typical signal in fluttering mode. Note that compared to Fig. S3, the oscillations occur around a higher  
199 basal level.

200 **Movie S12. Experimental data for the fluttering state. Third instar wing discs incubated in ZB media + 40**  
201 **(v/v) % fly extract shows Ca<sup>2+</sup> fluttering**

202 **Movie S13. The simulation result for fluttering effect.**

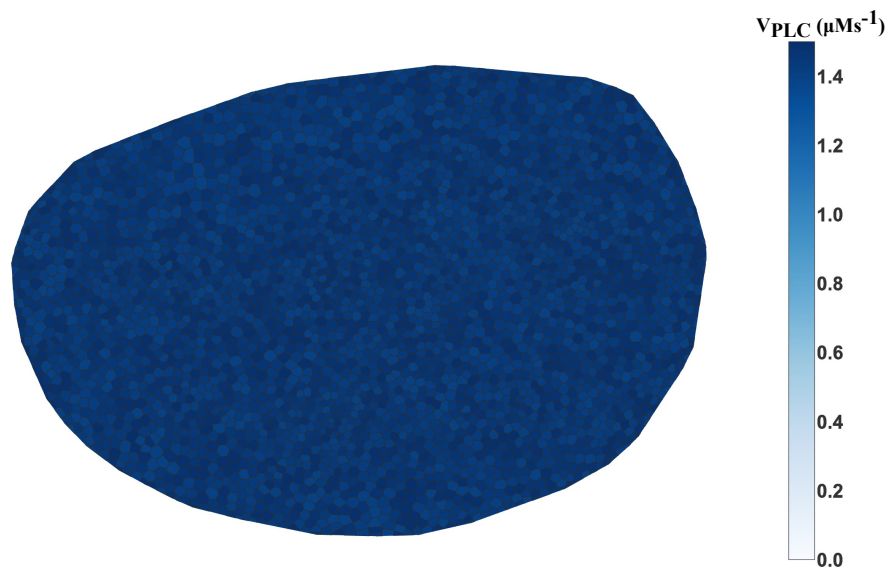

**Fig. S22. Stimulation profile of fluttering case corresponding to Movie S13.** This figure illustrates the color map of  $V_{PLC}$  throughout the tissue. We assumed  $V_{PLC}$  remains fixed throughout simulation interval.

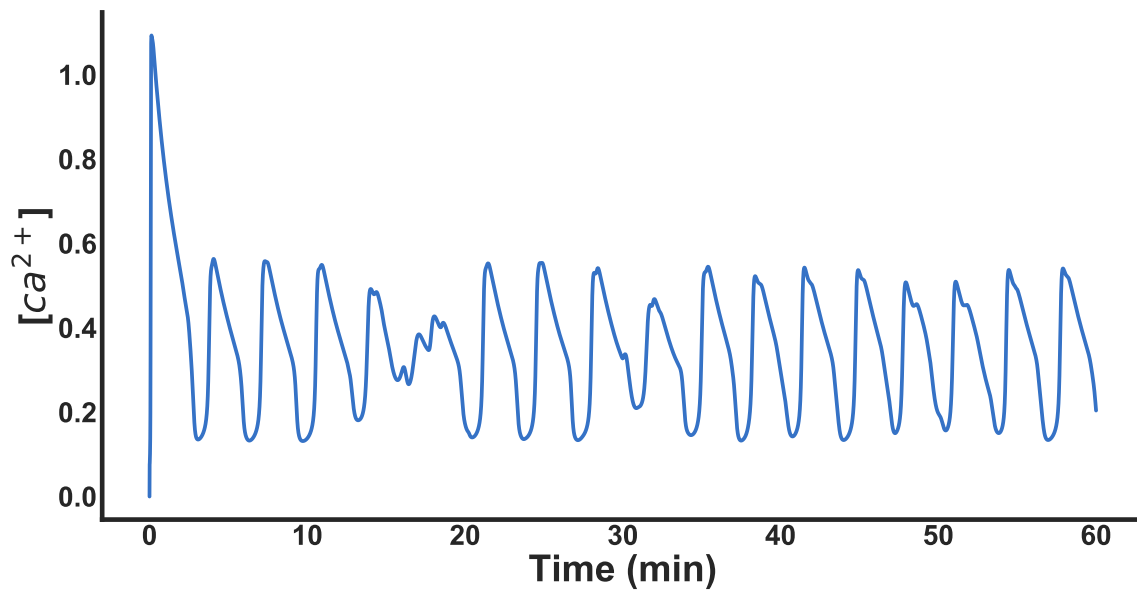

Fig. S23. Typical form of  $\text{Ca}^{2+}$  fluttering signal. The fluttering signal oscillate around an elevated basal level.

203 **Movie S14. The overexpression of  $\text{G}\alpha_q$  induces  $\text{Ca}^{2+}$  waves.**

#### 204 **References**

- 205 1. Politi A, Gaspers LD, Thomas AP, Höfer T (2006) Models of  $\text{ip}_3$  and  $\text{Ca}^{2+}$  oscillations: frequency encoding and  
206 identification of underlying feedbacks. *Biophysical journal* 90(9):3120–3133.
- 207 2. Brodskiy PA, et al. (2019) Decoding calcium signaling dynamics during Drosophila wing disc development. *Biophysical*  
208 *journal* 116(4):725–740.
- 209 3. Sneyd J, et al. (2017) On the dynamical structure of calcium oscillations. *Proceedings of the National Academy of Sciences*  
210 p. 201614613.
- 211 4. Narciso C, et al. (2015) Patterning of wound-induced intercellular  $\text{Ca}^{2+}$  flashes in a developing epithelium. *Physical*  
212 *biology* 12(5):056005.
- 213 5. Burnette M, Brito-Robinson T, Li J, Zartman J (2014) An inverse small molecule screen to design a chemically defined  
214 medium supporting long-term growth of drosophila cell lines. *Molecular BioSystems* 10(10):2713–2723.
- 215 6. Narciso CE, Contento NM, Storey TJ, Hoelzle DJ, Zartman JJ (2017) Release of applied mechanical loading stimulates  
216 intercellular calcium waves in drosophila wing discs. *Biophysical journal* 113(2):491–501.
- 217 7. Heller D, et al. (2016) Epitools: an open-source image analysis toolkit for quantifying epithelial growth dynamics.  
218 *Developmental cell* 36(1):103–116.
- 219 8. De Chaumont F, et al. (2012) Icy: an open bioimage informatics platform for extended reproducible research. *Nature*  
220 *methods* 9(7):690.
- 221 9. Lloyd S (1982) Least squares quantization in pcm. *IEEE transactions on information theory* 28(2):129–137.
- 222 10. Nematbakhsh A, et al. (2017) Multi-scale computational study of the mechanical regulation of cell mitotic rounding in  
223 epithelia. *PLoS computational biology* 13(5):e1005533.
